1 **DHX36 binding at G-rich sites in mRNA untranslated regions promotes translation**

2

3 Markus Sauer<sup>1,2</sup>, Stefan Juranek<sup>2</sup>, Hinke G. Kazemier<sup>2</sup>, Daniel Benhalevy<sup>3</sup>, Xiantao Wang<sup>3</sup>,

4 Markus Hafner<sup>3\*</sup>, Katrin Paeschke<sup>1,2\*</sup>

5

6 <sup>1</sup>Department of Biochemistry, Biocenter, University of Würzburg, 97074 Würzburg, Germany

7 <sup>2</sup>European Research Institute for the Biology of Ageing (ERIBA), University Medical Center  
8 Groningen, University of Groningen, 9713 AV Groningen, the Netherlands

9 <sup>3</sup>Laboratory of Muscle Stem Cells and Gene Regulation, National Institute of Arthritis and  
10 Musculoskeletal and Skin Diseases, NIH, Bethesda, MD 20892, USA

11

12

13 \*co-corresponding authors:

14 Correspondence should be send to [k.paeschke@umcg.nl](mailto:k.paeschke@umcg.nl), [markus.hafner@nih.gov](mailto:markus.hafner@nih.gov)

15

16

17

18 **Running title:** DHX36 promotes translation efficiency

19 **ABSTRACT (150 words max.)**

20

21 Translation efficiency can be affected by mRNA stability and secondary structures, including so-  
22 called G-quadruplex (G4) structures. The highly conserved and essential DEAH-box helicase  
23 DHX36/RHAU is able to resolve G4 structures on DNA and RNA *in vitro*, however a system-  
24 wide analysis of DHX36 targets and function is lacking. We globally mapped DHX36 occupancy  
25 in human cell lines and found that it preferentially binds to G-rich sequences in the coding  
26 sequences (CDS) and 5' and 3' untranslated regions (UTR) of more than 4,500 mRNAs.  
27 Functional analyses, including RNA sequencing, ribosome footprinting, and quantitative mass  
28 spectrometry revealed that DHX36 decreased target mRNA stability. However, target mRNA  
29 accumulation in DHX36 KO cells did not lead to a significant increase in ribosome footprints or  
30 protein output indicating that they were translationally incompetent. We hypothesize that DHX36  
31 resolves G4 and other structures that interfere with efficient translation initiation.

32

33

34

35 Keywords: RNA secondary structures, protein homeostasis, G-quadruplex, mRNA turnover,  
36 RNA protein interactions

37

## 38 INTRODUCTION

39 All messenger RNAs (mRNAs) are coated with a dynamically changing repertoire of RNA  
40 binding proteins (RBP) to form ribonucleoprotein particles (RNP) that mediate mRNA splicing,  
41 editing, transport, turnover, and translation (Gerstberger et al., 2014; Kastelic and Landthaler,  
42 2017; Keene, 2007). Many of these processes require energy-driven remodeling of RNP  
43 composition or RNA secondary structures by RNA helicases, a large class of motor proteins  
44 consisting of at least 95 members in humans (Gerstberger et al., 2014; Jankowsky, 2011;  
45 Umate et al., 2011). Consequently, dysregulation of helicase activity is associated with multiple  
46 diseases, including various cancer types (Fuller-Pace, 2013; Steimer and Klostermeier, 2012).  
47 For example, overexpression of eIF4A, the RNA helicase involved in translation initiation,  
48 promotes malignant transformation by increasing the protein expression of a number of  
49 oncogenes containing potentially G-quadruplex (G4) forming structures in the 5' untranslated  
50 region (UTR) of their mRNA (Wolfe et al., 2014).

51 G4 structures are stable DNA or RNA secondary structures that at their core contain  
52 stacked guanine tetrads built by Hoogsteen hydrogen bonding (Bochman et al., 2012; Millevoi et  
53 al., 2012; Rhodes and Lipps, 2015). The human genome is predicted to encode over 13,000  
54 RNA-G4 structures (Kwok et al., 2016), which may impact a wide range of processes, including  
55 mRNA 3' end processing, or telomerase activity (Millevoi et al., 2012; Rhodes and Lipps, 2015;  
56 Song et al., 2016). Most intensively studied are the effects of RNA G4 structures on translation:  
57 they are postulated to influence cap-independent translation by altering IRES (Internal  
58 Ribosome Entry Site) recognition of viral and cellular transcripts (Baird et al., 2006; Bonnal et  
59 al., 2003; Cammas et al., 2015; Morris et al., 2010), or, depending on the location of the G4  
60 structure, they block translational elongation (Endoh and Sugimoto, 2016; Thandapani et al.,  
61 2015). These findings suggest that RNA G4 structures perform important posttranscriptional  
62 regulatory functions. Nevertheless, Guo and Bartel noted that in eukaryotes RNA G4 structures  
63 are globally unfolded *in vivo* (J. U. Guo and Bartel, 2016) and likely require a dedicated

64 machinery to resolve them and modulate their effects on cellular output. To this date only a  
65 handful of proteins, including the helicase DHX36, were shown to disrupt RNA G4 structures *in*  
66 *vitro* (Sauer and Paeschke, 2017).

67 DHX36 is a 3'-5' DEAH-box helicase conserved in eukaryotes down to choanoflagellates  
68 (Lattmann et al., 2010). Loss of DHX36 in mice is embryonically lethal (Lai et al., 2012) and it is  
69 required for cardiac development (Nie et al., 2015). DHX36 is found upregulated in most breast  
70 cancer cell lines, as well as in more than 30% of human lung cancers deposited on the  
71 cBioPortal (Gao et al., 2013; Huang et al., 2012). DHX36 has two alternative gene names: RNA  
72 helicase associated with AU-rich elements (RHAU), based on its interaction with the AU-rich  
73 element of the PLAU mRNA (Tran et al., 2004), and G4 resolvase 1 (G4R1), due to its ability to  
74 unwind DNA and RNA G4 structures in HeLa cell lysate in an ATP-dependent manner (Creacy  
75 et al., 2008; Vaughn et al., 2005). In addition to its helicase core region DHX36 contains a  
76 characteristic 13 amino acid (aa) long RHAU-specific motif (RSM), which can bind RNA G4  
77 structures *in vitro* with picomolar affinities ( $K_D$  of ~39-70 pM) (Booy et al., 2012; Chalupníková et  
78 al., 2008; Creacy et al., 2008; Lattmann et al., 2010) (Fig. 1A).

79 Most proposed molecular functions for DHX36 focus on its ability to specifically bind and  
80 unwind DNA and RNA G4 structures *in vitro* (Booy et al., 2012; Chalupníková et al., 2008;  
81 Creacy et al., 2008; Lattmann et al., 2010). Individual studies suggested that DHX36 is also able  
82 to resolve G4 structure formation *in vivo*: e.g. DHX36 was able to interact with transfected G4-  
83 forming segments of human telomerase RNA (TERC) in cultured cells and TERC mutations  
84 abolishing G4 formation *in vitro* affected cell proliferation (Booy et al., 2012; Lattmann et al.,  
85 2011; Sexton and Collins, 2011). Fusing potentially G4-forming fragments to luciferase or GFP  
86 sequences, or placing them into the promoter regions of reporter constructs affected reporter  
87 gene expression in a DHX36-dependent manner (Booy et al., 2014; Huang et al., 2012; Nie et  
88 al., 2015). In total, 27 direct RNA targets for DHX36 were previously determined (Booy et al.,  
89 2014; Nie et al., 2015; Sexton and Collins, 2011; Tran et al., 2004) (Suppl. Table S1). However,

90 considering the large number of predicted RNA G4 structures (J. U. Guo and Bartel, 2016;  
91 Kwok et al., 2016) the full complement of DHX36 targets and its impact on gene regulation  
92 remain unknown.

93         Here we aimed to obtain comprehensive insight into DHX36 targets and function using  
94 biochemical and systems-wide approaches. We identified DHX36 as a predominantly  
95 cytoplasmic RBP and profiled its RNA targets on a transcriptome-wide scale at single nucleotide  
96 (nt) level resolution by Photoactivatable Ribonucleoside Enhanced Crosslinking and  
97 Immunoprecipitation (PAR-CLIP) (Hafner et al., 2010) using the wildtype protein as well as the  
98 catalytically inactive E335A mutant (Booy et al., 2014). PAR-CLIP revealed that DHX36 bound  
99 tens of thousands of G-rich sites distributed over mature mRNAs. DHX36 binding sites  
100 coincided with regions that were recently reported to form G4 and other stable structures (Kwok  
101 et al., 2016). Loss-of-function analysis with DHX36 KO cells coupled with RNA sequencing  
102 (RNA-seq), ribosome profiling (Ribo-seq), and stable isotope labeling by amino acids in cell  
103 culture (SILAC) revealed that binding of DHX36 in the 3' and 5' UTR resulted in higher target  
104 mRNA translational efficiency, while at the same time decreasing DHX36 target mRNA  
105 abundance. Our results underline that while G-rich regions in 3' and 5' UTRs can increase RNA  
106 stability, they nevertheless reduce their translation competence.

## 107 **RESULTS**

108

### 109 **DHX36 is a cytoplasmic helicase interacting with mRNA in human cultured cells**

110 Human DHX36 was found to encode at least two splice isoforms that differ by alternative 5'  
111 splice site usage in exon 13 that results in the exclusion of a potential nuclear localization signal  
112 (NLS) in isoform 2 (Fig. 1A) (Tran et al., 2004). Because of the suggested nuclear as well as  
113 cytoplasmic localization for DHX36 isoforms, we investigated whether the inclusion of the  
114 putative NLS could influence subcellular localization. We generated stable HEK293 cell lines  
115 expressing FLAG/HA-tagged DHX36 (FH-DHX36) isoforms 1 and 2 under control of a  
116 tetracycline inducible promoter (Spitzer et al., 2013). Upon tetracycline induction, FH-DHX36  
117 isoforms 1 and 2 accumulate to approx. 3 to 4-fold levels compared to endogenous DHX36 in  
118 HEK293 cells (Fig. 1B), determined by quantitative western blotting using antibodies  
119 recognizing the N-terminal region of DHX36. Subcellular fractionation revealed that both  
120 transgenic DHX36 isoforms, as well as endogenous DHX36 predominantly localize to the  
121 cytoplasm (Fig. 1C).

122 While DHX36 has been described as both a DNA and RNA helicase *in vitro*, the major  
123 source of nucleic acids in the cytosol is RNA. Thus, we tested whether DHX36 indeed interacted  
124 with RNA, in particular mRNAs, in human cell lines. Cells were crosslinked using 254 nm UV-  
125 light in HEK293 cells followed by purification of polyadenylated RNA (Fig. 1D). We found that  
126 DHX36 was abundantly interacting with polyadenylated RNA, indicating that cytosolic mRNAs  
127 are the main targets of DHX36.

128

### 129 **DHX36 is found in the soluble cytoplasm and associated with the translational machinery**

130 The interaction of DHX36 and mRNAs in the cytosol suggested a posttranscriptional regulatory  
131 function, which is in agreement with a previously proposed function of DHX36 in translational  
132 regulation (Thandapani et al., 2015). We fractionated HEK293 cells extract by ultracentrifugation

133 through sucrose gradient to investigate whether DHX36 co-migrates with the translational  
134 machinery. In proliferating HEK293 cells approximately 90% of endogenous DHX36 migrated  
135 with the soluble cytoplasm, and the remaining 10% migrated with the monosomal and  
136 polysomal fractions (Fig. 1E). Treatment of the lysate with RNase A resulted in the collapse of  
137 polysomes and the loss of DHX36 from heavier fractions (Fig. 1E). Taken together, this data  
138 indicated that only a fraction of DHX36 is loaded on actively translated mRNAs, implying that a  
139 putative effect on translation would likely not occur at the translational elongation step.

140

#### 141 **DHX36 binds thousands of sites on mature mRNAs**

142 In order to reliably capture DHX36 binding sites and characterize its RNA recognition elements  
143 (RREs) we mapped the RNA interactome of DHX36 in living cells on a transcriptome-wide scale  
144 at nucleotide-resolution using 4-thiouridine (4SU) PAR-CLIP (Hafner et al., 2010). UV-  
145 crosslinking of active helicases that translocate on their RNA targets may result in the recovery  
146 of transient interactions between RNA and protein, which could complicate the determination of  
147 the preferred interaction sites. To overcome this difficulty, we performed PAR-CLIP in two stable  
148 HEK293 cell lines, either inducibly expressing FLAG-HA tagged DHX36 or the catalytically dead  
149 DHX36 E335A mutant, which is expected to remain bound at the sites of DHX36 recruitment to  
150 the mRNA.

151       Autoradiography of the crosslinked, ribonuclease-treated, and radiolabeled FLAG-  
152 immunoprecipitate confirmed the isolation of one main RNP depicted by a single major band at  
153 the expected size of ~130 kDa corresponding to the DHX36 and FH-DHX36 E335A RNPs (Fig.  
154 2A). We recovered the bound RNA fragments from the FH-DHX36 and FH-DHX36 E335A  
155 RNPs of two biological replicates and generated small RNA cDNA libraries for next-generation  
156 sequencing. We used the PARalyzer software (Corcoran et al., 2011) to determine clusters of  
157 overlapping reads that contained T-to-C mutations diagnostic of the crosslinking event at higher  
158 frequencies than expected by chance (see Suppl. Table S1 for summary statistics). The

159 biological replicates from the FH-DHX36 and FH-DHX36 E335A PAR-CLIP exhibited high  
160 correlation, with an  $R^2$  of 0.79 and 0.93, respectively (Suppl. Fig. S1A, B). For the FH-DHX36  
161 and FH-DHX36 E335A PAR-CLIPs we defined as high-confidence binding sites 19,585 and  
162 67,660 clusters, respectively, that were found in both replicates (Suppl. Table S2). Overall the  
163 binding profiles of FH-DHX36 and FH-DHX36 E335A were similar, with an  $R^2$  of 0.66, indicating  
164 that inactivating the helicase domain did not interfere dramatically with the binding pattern of the  
165 protein (Fig. 2B).

166 Our approach succeeded to capture 22 of 27 previously published targets of DHX36,  
167 including TERC and PLAU, confirming the validity of our approach (Suppl. Table S1).  
168 Consistent with their mainly cytoplasmic localization, 70% and 73% of FH-DHX36 and FH-  
169 DHX36 E335A binding sites, respectively, mapped to the exonic regions of more than 4,500  
170 protein-coding genes with the rest found on intronic sequences or non-coding RNAs (Fig. 2C).  
171 FH-DHX36 and FH-DHX36 E335A did not exhibit preference for the coding sequence or  
172 untranslated regions (3' and 5' UTR) of mRNA targets (Fig. 2D), which may be the result of FH-  
173 DHX36 interacting with RNA independent of the translational machinery. A metagene analysis  
174 revealed an enrichment of FH-DHX36 and FH-DHX36 E335A binding sites within the first 100  
175 nucleotides of the start codon in the CDS, similar to another cytoplasmic G-rich element binding  
176 protein (Benhalevy et al., 2017), as well as directly downstream of the stop codon (Fig. 2E and  
177 Suppl. Fig. S1E).

178

### 179 **DHX36 binds G-rich sequences *in vivo* and can unwind G4 structures *in vitro***

180 Binding of FH-DHX36 and FH-DHX36 E335A to mRNAs showed no correlation to transcript  
181 length or abundance as determined by RNA-seq in HEK293 cells (Suppl. Fig. S1C, D). This  
182 suggested sequence- or structure-dependent determinants of FH-DHX36 binding, rather than  
183 unspecific interactions. Therefore, we aimed to define the preferred RRE of FH-DHX36 and FH-  
184 DHX36 E335A. We first counted the occurrence of all possible 5-mer sequences in our high-



185 confidence binding sites and calculated their Z-score over a background of shuffled sequences  
186 of the same nucleotide composition. 5-mers that contained at least three guanines were  
187 enriched in both, FH-DHX36 and FH-DHX36 E335A, PAR-CLIPs (Fig. 3A, B and Suppl. Fig.  
188 S2A and Table S2) and in the FH-DHX36 E335A PAR-CLIP we additionally found the  
189 enrichment of 5-mers that were A/U-rich (Fig. 3C and Suppl. Table S2). We also used MEME  
190 (Bailey et al., 2009) as an alternative *in silico* approach to define the RRE. Here, the most  
191 significantly enriched RRE was also G-rich, and matched the motif for G4 formation (Todd et al.,  
192 2005) (Fig. 3D). Indeed, circular dichroism (CD) spectroscopy analysis confirmed that synthetic  
193 oligonucleotide corresponding to an representative PAR-CLIP RRE showed the characteristic  
194 spectrum of a parallel G4 structure, while sequence mutations exchanging G residues with A or  
195 C resulted in a loss of the G4 signature (Suppl. Fig. S2B). Microscale thermophoresis  
196 experiments confirmed that FH-DHX36 specifically bound the G4 forming oligonucleotides, but  
197 not the mutants (Fig. 3E).

198         Considering that this representative RRE was able to form a G4 structure we asked  
199 whether the FH-DHX36 PAR-CLIP binding sites were contained in a previously reported dataset  
200 that mapped G4 structures *in vitro* in polyadenylated RNA from HeLa cells in a transcriptome-  
201 wide manner (Kwok et al., 2016). Interestingly, 74% of the potential G4 sites found by Kwok et  
202 al. in the 3' UTR were recovered in the FH-DHX36 E335A PAR-CLIP, despite that we were  
203 using a cell line with a different transcriptome profile for our experiments (Fig. 3F). 59% and  
204 44% of the G4 sites in 5'UTR and CDS, respectively, also overlapped with FH-DHX36 E335A  
205 PAR-CLIP binding sites. Collectively, our *in vivo* and *in vitro* data showed that FH-DHX36 is  
206 preferentially binding G-rich elements in the CDS and UTRs which share the potential to fold  
207 into secondary RNA structures like G4 structures.

208

209 **DHX36 impacts target RNA abundance**

210 In order to investigate gene regulatory roles of DHX36 in loss-of-function studies, we generated  
211 DHX36 knockout (KO) HEK293 cells using Cas9-mediated gene editing. Sequencing of the  
212 DHX36 locus and western blotting of the clone used in follow-up experiments confirmed an  
213 extensive deletion and loss of detectable protein (Fig. 4A, Suppl. Fig. S3A). In contrast to  
214 DHX36 transgene induction, DHX36 loss had a profound effect on the growth rate and  
215 morphology of HEK293 cells. KO cells proliferated at ~50% growth rate (Fig. 4B) and cells  
216 appeared incapable of spreading evenly in the culture dish (Suppl. Fig. S3B) consistent with a  
217 cell proliferation defect found in hematopoietic cells from conditional DHX36 KO mice (Lai et al.,  
218 2012).

219 Subsequently, DHX36 KO cells were used to investigate the effect of DHX36 on target  
220 mRNA abundance using RNA-seq (Suppl. Table S3). For the following analyses we focused on  
221 DHX36 targets from the deeper FH-DHX36 E335A PAR-CLIP dataset (Fig. 4). Nevertheless, we  
222 observed similar results using the highly overlapping FH-DHX36 PAR-CLIP data (Suppl. Fig.  
223 S4). Loss of DHX36 led to an increase in its targets mRNA levels. This effect was dependent on  
224 the number of binding sites (Fig. 4C) and to a binding coefficient calculated as the number of  
225 crosslinked PAR-CLIP reads per million normalized standardized by target RNA expression  
226 (NXPM) (Fig. 4D). We found that both these metrics correlated well with the occupancy of an  
227 RBP on its target (Ascano et al., 2012; Hafner et al., 2010). For the top FH-DHX36 E335A  
228 targets binned by cluster number (> 20 clusters, n = 218) or NXPM (NXPM > 100, n = 381)  
229 mRNA levels were increased upon DHX36 loss by 25% and 15%, respectively.

230 We further investigated the effect of the DHX36 binding site location on mRNA  
231 abundance and binned our targets according to binding in the 3' UTR, 5' UTR, or CDS. We  
232 found that binding to the UTRs, particularly the 5' UTR, conferred a considerably stronger effect  
233 on mRNA abundance compared to CDS binding sites (Figs. 4E-G). We tried to refine this  
234 analysis by identifying mRNAs that were exclusively bound by DHX36 either in the CDS or in  
235 the UTRs. Only 130 mRNAs (and only 4 with exclusive binding 5' UTR) that met these criteria

236 could be identified. Although this analysis was less robust it revealed that CDS binding sites did  
237 not influence mRNA abundance. Taken together our data suggest that only UTR sites confer  
238 posttranscriptional regulatory effects.

239         Because of the large overlap of our DHX36 binding sites to potential G4 motifs or other  
240 stable structures *in vitro* (Kwok et al., 2016), we asked whether the abundance of mRNAs is  
241 affected by DHX36 binding at these special regions. Indeed, target mRNAs bound by DHX36 at  
242 potential G4 structures increased in abundance by ~16% in DHX36 KO cells indicating that  
243 DHX36 maybe involved in their turnover (Fig. 4H).

244

#### 245 **DHX36 increases translational efficiency of its targets**

246 DHX36 was proposed to be involved in translational regulation (Thandapani et al., 2015). We  
247 therefore asked whether DHX36 affected translation and directly measured the impact of  
248 DHX36 on ribosome occupancy on its targets using ribosome footprinting (Ribo-seq) (Ingolia et  
249 al., 2009) in DHX36 KO and the corresponding parental cells (Suppl. Table S4). DHX36 loss  
250 resulted in a marginal, albeit statistically significant decrease in ribosome protected fragments ( $p$   
251  $<10^{-5}$ , two-sided Kolmogorov-Smirnov test, Fig. 5A, B and Suppl. Fig. S5A, B) independent of  
252 whether the binding sites were found in the CDS or the UTRs (Fig. 5C-E and Suppl. Fig. S5C,  
253 D). We also measured changes in global protein levels using stable isotope labeling in cell  
254 culture (SILAC) followed by mass spectrometry. A modest but significant decrease in protein  
255 levels from DHX36 top targets upon DHX36 loss was detected, which is consistent with the  
256 decrease in RPFs (Fig. 5G and Suppl. Fig. S5F and Suppl. Table S4).

257         We calculated the average density of ribosomes on each mRNA in DHX36 KO and  
258 control cells by normalizing the number of RPFs with the mRNA abundance. This score, known  
259 as the translational efficiency (TE), removes effects of mRNA abundance and approximates the  
260 translational output for each mRNA molecule of a given gene (Bazzini et al., 2012; H. Guo et al.,  
261 2010; Ingolia et al., 2009). DHX36 KO strongly correlated with a decreased TE on DHX36

262 targets, independent of binning by PAR-CLIP binding site number or NXPM (~27% decrease for  
263 the 385 and 506 top DHX36 targets with NXPM > 100 or > 5 binding sites, respectively (Fig. 6  
264 A, B and Suppl. Fig. S6). Interestingly, the decrease in target TE upon DHX36 KO was again  
265 more pronounced in targets bound in the UTRs than in the CDS (Fig. 6C-E and Suppl. Fig. S6).  
266 Analogous to RNA abundance shown above, potentially G4 forming RNAs exhibited a 17%  
267 decreased TE upon DHX36 KO (Fig. 6F). Taken together with our observation that >90% of  
268 DHX36 were not co-sedimenting with translating ribosomes and thus was unlikely to influence  
269 translation elongation, our data suggest that DHX36 increases the translational competence of  
270 mRNAs by resolving potentially G4 forming structures in 3' and 5' UTRs and thereby allowing  
271 access for the translation initiation machinery.

272

### 273 **DHX36 posttranscriptionally regulates mRNA stability**

274 Its mainly cytoplasmic localization suggests a posttranscriptional mechanism of action for  
275 DHX36. Nevertheless, isolated reports pointed at a function in DNA G4 recognition and thus  
276 transcriptional regulation (Huang et al., 2012). We formally investigated whether the  
277 accumulation of target transcripts in DHX36 KO was due to an increase in their transcription or  
278 their stability. We isolated nascent chromatin-associated RNA in wildtype and DHX36 KO cells  
279 followed by RNA sequencing. Compared to wildtype cells DHX36 KO cells showed no increase  
280 in newly-synthesized target mRNAs (Fig. 7A and Suppl. Table S5), suggesting no changes in  
281 transcriptional output. We also blocked transcription with actinomycin D and collected samples  
282 at different time points after treatment to measure mRNA turnover. All four representative  
283 DHX36 targets that we quantified by qPCR had an increased half-life in DHX36 KO cells (Fig.  
284 7B, C and Suppl. Fig. S7A, B). Taken together with our RNA-seq data from DHX36 wildtype and  
285 KO cells, these results demonstrate that target mRNA turnover is promoted by DHX36, and that  
286 the formation of G-rich structures in their UTRs prevent their degradation. To check if G4  
287 structures themselves have an effect on mRNA stability, we analyzed mRNA abundance by

288 RNA-seq after the addition of 2  $\mu$ M of the G4 stabilizing small molecule PDS for 42 h. G4  
289 stabilization by PDS in wildtype cells resulted in a significant increase in DHX36 target mRNA  
290 abundance, even exceeding the effect of DHX36 loss (Fig. 7D and Suppl. Table S5) and  
291 suggesting that formation of G4 structures indeed reduced mRNA turnover or prevented  
292 degradation.

## 293 **DISCUSSION**

294 Here we present a comprehensive and systems-wide characterization of the targets and  
295 function of the DEAH-box helicase DHX36. We identified target RNA binding sites  
296 transcriptome-wide, delineated consensus binding motifs, and globally defined the effect of  
297 DHX36 binding on target mRNA abundance and translation. To date only few DHX36 targets  
298 were described, and our approach expanded this list and demonstrated that DHX36 is  
299 specifically interacting with thousands of RNAs, including 22 of the 27 previously known ones  
300 (Booy et al., 2014; Nie et al., 2015; Sexton and Collins, 2011; Tran et al., 2004) (Suppl. Table  
301 S1). We propose a model in which DHX36 disrupts structured regions in mRNA UTRs, which  
302 would otherwise render the mRNA translation incompetent and prevent their turnover.

303 Two seemingly antagonistic *in vivo* binding motifs were offered for DHX36: on the one  
304 hand it bound A/U-rich elements in the 3' UTR of the PLAU mRNA and recruited destabilizing  
305 factors, such as PARN (Tran et al., 2004), and on the other hand it interacted with DNA or RNA  
306 G4 structures unwinding them *in vitro* (Creacy et al., 2008; Vaughn et al., 2005). Mapping  
307 DHX36 binding sites transcriptome-wide allowed us to reconcile these binding models (Fig. 2).  
308 DHX36 did indeed preferentially bind G-rich sequences, including sites in the 3' UTR of the first  
309 described DHX36 target gene, PLAU. Nevertheless, we also observed an enrichment of A/U-  
310 rich sequences in DHX36 PAR-CLIPs using the catalytically inactive mutant DHX36 E335A (Fig.  
311 3). We think A/U-rich elements are genuine binding sites of DHX36 and may even serve as the  
312 protein recruitment sites to mRNAs. However we suggest that DHX36 translocation from these  
313 sites is rapid due to their less structured nature, which prevents efficient UV crosslinking to the  
314 catalytically active helicase.

315 Most hypotheses on DHX36 function relate to its ability to bind and resolve G4  
316 structures. The top binding sites recovered by PAR-CLIP fulfill the rules for G4 formation and  
317 PAR-CLIP recovered more than 50% of the G4 structures formed *in vitro* on HeLa mRNA (Kwok  
318 et al., 2016) underscoring the connection between DHX36 and G4 structures (Figs. 4, 5).

319 Nevertheless, we identified additional G-rich regions with strong DHX36 binding that are not  
320 necessarily predicted to form canonical G4 structures. These sequence stretches may belong to  
321 recently reported G4 classes with less guanines and longer loops, which complicates their  
322 prediction (Pandey et al., 2013). Alternatively, DHX36 could be involved in the resolution of  
323 other structured regions in the transcriptome.

324 In eukaryotes, an entire machinery likely exists that suppresses G4 and other structures,  
325 considering that on one hand G4 structures are globally unfolded and on the other hand G4  
326 forming RNAs are toxic in prokaryotes that do not contain predicted G4 structures in their  
327 transcriptome (J. U. Guo and Bartel, 2016). Using DMS-seq, Guo et al. also found that neither  
328 depletion of ATP, nor of DHX36 itself resulted in the detection of G4 *in vivo*, which they  
329 interpreted as helicase-independent G4 resolution by RBPs. However, currently at least four  
330 helicases are known to affect RNA G4 unfolding *in vitro* (Sauer and Paeschke, 2017) and these  
331 proteins possibly compensate for each other's loss, dampening the effect of the knockdown of a  
332 single factor. For example, on DNA G4 structures, Rrm3 rescues for the loss of Pif1 helicase  
333 (Paeschke et al., 2013). The fact that DHX36 KO cells remain viable, although with a growth  
334 defect (Fig. 4) and only exhibit an ~30% accumulation of the best DHX36 target mRNAs (Fig. 4)  
335 does hint at a larger, compensatory network of G4 resolving factors *in vivo*. Redundancy of the  
336 G4 remodeling machinery is also consistent with a recent analysis that showed that the copy  
337 numbers of G4 containing RNAs are insufficient to force G4 folding and that only overexpressed  
338 RNA will form G4 *in vivo* (Serikawa et al., 2017).

339 We speculate that most G4 resolving factors remain to be identified, considering that  
340 transcriptome-wide functional data are limited to only two RBPs, CNBP and eIF4A, that both  
341 have clear preference for target mRNA CDS or 5' UTR (Benhalevy et al., 2017; Wolfe et al.,  
342 2014). For example, the translation initiation factor eIF4A is essential for unwinding secondary  
343 RNA structures in the 5' UTR (Jackson et al., 2010; Sonenberg and Hinnebusch, 2009). Its loss  
344 results in an increase in ribosome footprints in the 5' UTR of eIF4A target mRNAs, which was

345 explained by unresolved G4 structures (Wolfe et al., 2014). CNBP, increases translational  
346 efficiency by binding and preventing structure formation at G-rich regions in target mRNA CDS  
347 (Benhalevy et al., 2017). In contrast to these two examples DHX36 preferentially affected  
348 mRNA abundance by binding to UTRs rather than ribosome occupancy, indicating that the  
349 factors compensating for DHX36 loss remain uncharacterized. While DHX36 does recognize  
350 G4-forming and other G-rich sites in the mRNA CDS, its activity appears not to be required to  
351 disrupt them. We predict that other proteins, e.g. CNBP or the ribosome itself (Benhalevy et al.,  
352 2017; Endoh and Sugimoto, 2016), resolve those structures.

353       Until recently, questions focused on the function of RNA G4 motifs in the 5' UTR, which  
354 were shown to impact translation initiation and decrease protein expression by inhibiting the  
355 ribosome, using various reporter systems and *in vivo* approaches (Kumari et al., 2007; Song et  
356 al., 2016; Wolfe et al., 2014). G4 motifs in 3' UTRs are less well studied but have been  
357 implicated in multiple processes including splicing, polyadenylation, and translation (Beaudoin  
358 and Perreault, 2013). Our data suggest that G4 (and other structures targeted by DHX36) in  
359 both UTRs have two effects: (1.) they result in the stabilization of the mRNA, and (2.) this  
360 stabilization does not result in an increased translation. Translation elongation or termination are  
361 unlikely to be affected by DHX36 considering that only a minority of DHX36 is found on  
362 polysomes and that we do not find a pile-up of ribosomes close to the stop codons or in the 3'  
363 UTR of target mRNAs. This indicates that the additional target mRNA in DHX36 KO cells is not  
364 translation competent, either due to decreased efficiency of translation initiation, or by  
365 sequestration of these RNAs into granules, such as P-bodies or stress granules, which are  
366 known to recruit G4 structures and function as storage for untranslated mRNA (Byrd et al.,  
367 2016; Chalupníková et al., 2008; Hubstenberger et al., 2017; Ivanov et al., 2014). DHX36 might  
368 impact translational output by modifying the levels of translatable target mRNAs. Such a  
369 regulatory process might be required in highly proliferative cells (e.g. in cancer or during  
370 development) with their increased demand on protein synthesis.



371 **METHODS**

372

373 **KEY RESOURCES TABLE**

| REAGENT or RESOURCE                      | SOURCE                      | IDENTIFIER      |
|------------------------------------------|-----------------------------|-----------------|
| Antibodies                               |                             |                 |
| Mouse monoclonal anti-FLAG               | Sigma-<br>Aldrich           | Cat#: F1804     |
| Mouse monoclonal anti-HA                 | Covance                     | Cat#: MMS-101R  |
| Mouse monoclonal anti-RPL22              | Santa Cruz<br>Biotechnology | Cat#: sc-136413 |
| Mouse monoclonal anti-DDX36              | Santa Cruz<br>Biotechnology | Cat#: sc-377485 |
| Mouse monoclonal anti- $\alpha$ -Tubulin | Sigma-<br>Aldrich           | Cat#: T5168     |
| Mouse monoclonal anti-Calnexin           | Abcam                       | Cat#: ab31290   |
| Mouse anti-FMRP                          | Linder et al.<br>2008       |                 |
| Mouse monoclonal anti-Histone 2B         | Abcam                       | Cat#: ab1790    |
| HRP-conjugated goat anti-mouse           | Santa Cruz<br>Biotechnology | Cat#: sc-2031   |
| HRP-conjugated goat anti-rabbit          | Santa Cruz<br>Biotechnology | Cat#: sc-2030   |

| Chemicals, Peptides, and Recombinant Proteins |                                                       |                       |
|-----------------------------------------------|-------------------------------------------------------|-----------------------|
| Tetracycline                                  | Sigma-<br>Aldrich                                     | Cat#: 87128           |
| Hygromycin B                                  | Invivogen                                             | Cat#: ant-hg-5        |
| Blasticidin                                   | Invivogen                                             | Cat#: ant-bl-1        |
| Zeocin                                        | Invivogen                                             | Cat#: ant-zn-1        |
| Cycloheximide                                 | Sigma<br>Aldrich                                      | Cat#: C1988           |
| L-Arginine:HCl (13C6, 99%)                    | Cambridge<br>Isotope<br>Laboratories.                 | Cat#: CLM-2265-H-0.05 |
| L-Lysine:2HCl (4,4,5,5,-D4, 96-98%)           | Cambridge<br>Isotope Laboratories                     | Cat#: DLM-2640-0.25   |
| L-Arginine:HCl (13C6,99%; 15N4, 99%)          | Cambridge<br>Isotope Laboratories                     | Cat#: CNLM-539-H-0.1  |
| L-Lysine:2HCl (13C6, 99%; 15N2, 99%)          | Cambridge<br>Isotope Laboratories                     | Cat#: CNLM-291-H-0.05 |
| 4-thiouridine (4SU)                           | Chemistry<br>Department,<br>University of<br>Würzburg | n/a                   |

|                                             |                             |                |
|---------------------------------------------|-----------------------------|----------------|
| Dynabeads Protein A                         | Thermo<br>Fisher Scientific | Cat#: 10001D   |
| Oligo d(T) <sub>25</sub> Magnetic Beads     | New England<br>Biolabs      | Cat#: S14193   |
| Turbo DNase I                               | Thermo<br>Fisher Scientific | Cat#: AM2238   |
| Alkaline Phosphatase, Calf Intestinal (CIP) | New England<br>Biolabs      | Cat#: M0290S   |
| T4 Polynucleotide Kinase                    | Thermo<br>Fisher Scientific | Cat#: EK0032   |
| RNase T1                                    | Thermo<br>Fisher Scientific | Cat#: EN0541   |
| Proteinase K                                | Carl Roth<br>GmbH + Co. KG  | Cat#: 7528.3   |
| T4 RNA Ligase 2, truncated K227Q            | New England<br>Biolabs      | Cat#: M0351S   |
| T4 RNA Ligase                               | Thermo<br>Fisher Scientific | Cat#: EL0021   |
| Superscript III Reverse Transcriptase       | Thermo<br>Fisher Scientific | Cat#: 18080044 |
| Phusion High-Fidelity DNA polymerase        | Thermo<br>Fisher Scientific | Cat#: F-531    |
| SUPERaseIn RNase Inhibitor                  | Thermo<br>Fisher Scientific | Cat#: AM2696   |

|                                                                |                             |                    |
|----------------------------------------------------------------|-----------------------------|--------------------|
| Carboxypyridostatin trifluoroacetate salt                      | Sigma-<br>Aldrich           | Cat#:<br>SML1176   |
| Cas9 Nuclease                                                  | IDT                         | Cat#:<br>1074181   |
| Critical Commercial Assays                                     |                             |                    |
| NEBNext rRNA Depletion Kit                                     | New England<br>Biolabs      | Cat#:<br>E6310     |
| NEBNext Ultra Directional RNA Library<br>Prep Kit for Illumina | New England<br>Biolabs      | Cat#:<br>E7420     |
| NEBNext Multiplex Oligos for Illumina                          | New England<br>Biolabs      | Cat#:<br>E7335     |
| QuantiTect Reverse Transcription kit                           | Qiagen                      | Cat#:<br>205313    |
| IQ SYBR Green                                                  | BioRad                      | Cat#: 170-<br>8885 |
| Lipofectamine CRISPRMAX Cas9<br>Transfection Reagent           | Thermo<br>Fisher Scientific | Cat#:<br>CMAX00015 |
| Deposited Data                                                 |                             |                    |
| ChrRNA-seq                                                     | This study                  | GEO:<br>GSE105169  |
| cPDS-RNA-seq                                                   | This study                  | GEO:<br>GSE105170  |

|                                                                                                                |                             |                   |
|----------------------------------------------------------------------------------------------------------------|-----------------------------|-------------------|
| PAR-CLIP-seq                                                                                                   | This study                  | GEO:<br>GSE105171 |
| Ribo-Seq                                                                                                       | This study                  | GEO:<br>GSE105172 |
| RNA-seq                                                                                                        | This study                  | GEO:<br>GSE105173 |
| Experimental Models: Cell Lines                                                                                |                             |                   |
| HEK293                                                                                                         | DSMZ                        | Cat#:<br>ACG035   |
| Flp-In T-Rex 293                                                                                               | Thermo<br>Fisher Scientific | Cat#:<br>R78007   |
| Flp-In T-Rex 293-DHX36-iso1                                                                                    | This study                  |                   |
| Flp-In T-Rex 293-DHX36-iso1 E335A                                                                              | This study                  |                   |
| Flp-In T-Rex 293-DHX36-iso2                                                                                    | This study                  |                   |
| Flp-In T-Rex 293-DHX36-iso2 E335A                                                                              | This study                  |                   |
| Oligonucleotides                                                                                               |                             |                   |
| Alt-R crRNA for CRISPR-Cas9 gene editing<br>rUrGrUrGrGrUrArCrGrCrGrArArArArArCr<br>ArGrGrUrUrUrArGrArGrCrUrArU | IDT                         |                   |
| Forward Primer for Cloning DHX36 in<br>pFRT-FlagHA<br>GGATCCGGATCCATGAGTTATGACTACC<br>ATCAG                    | Sigma-<br>Aldrich           |                   |

|                                                                                                                                                                 |                   |  |
|-----------------------------------------------------------------------------------------------------------------------------------------------------------------|-------------------|--|
| Reverse Primer for Cloning DHX36 in pFRT-FlagHA<br>CTCGAGCTCGAGTCAGCTGTAATATCCA<br>TCCTG                                                                        | Sigma-<br>Aldrich |  |
| Forward Primer Mutagenesis Isoform 1 in Isoform 2<br>GATCTCTTGATGTCACAAGTAATGTTTAA<br>ATCAGTTAACCAGACACAGGTGTTTAAAAGAAC<br>CCCTCCTGGTGTTCGGAAAATAGTAATTGC       | Sigma-<br>Aldrich |  |
| Reverse Primer Mutagenesis Isoform 1 in Isoform 2<br>GGGGTTCTTTTAAACACCTGTGTCTGGT<br>TAACTGATTTAAACATTACTTGTGACATCAAGA<br>GATCATGTAAAGTGCTGATATTGTCCAGCCTG<br>G | Sigma-<br>Aldrich |  |
| Forward Primer Mutagenesis WT in E335A<br>GTA CTTGATGCAATCCATGAAAGAAATC<br>TGCAGTCAG                                                                            | Sigma-<br>Aldrich |  |
| Reverse Primer Mutagenesis WT in E335A<br>CATGGATTGCATCAAGTACGATATGACT<br>AACACTGGAC                                                                            | Sigma-<br>Aldrich |  |
| DHX36 RRE<br>AAAAAAAAAAGGAGGAGGAGGAGGA                                                                                                                          | Sigma-<br>Aldrich |  |
| DHX36 mutated RRE 1<br>AAAAAAAAAAGAAGAAGGAGAAGAA                                                                                                                | Sigma-<br>Aldrich |  |
| DHX36 mutated RRE 2<br>AAAAAAAAAAGCAGCAGGAGCAGCA                                                                                                                | Sigma-<br>Aldrich |  |
| TP-G4<br>AAAAAAAAAAGGGGGAGCTGGGGTAGA<br>TGGGAATGTGAGGG                                                                                                          | Sigma-<br>Aldrich |  |

|                                                                   |                   |  |
|-------------------------------------------------------------------|-------------------|--|
| DHX36 RRE for (MST)<br>Cy5-AAAAAGGAGGAGGAGGAGGA                   | Sigma-<br>Aldrich |  |
| DHX36 mutated RRE for MST<br>Cy5-AAAAAGCAGCAGGAGCAGCA             | Sigma-<br>Aldrich |  |
| Forward qPCR primer for U6RNA<br><i>GCTTCGGCAGCACATATACTAAAAT</i> | Sigma-<br>Aldrich |  |
| Rev qPCR primer for U6RNA<br><i>CGCTTCACGAATTTGCGTGTCAT</i>       | Sigma-<br>Aldrich |  |
| Forward qPCR primer for WAC<br>GCCGGAGATCCTTCACCAC                | Sigma-<br>Aldrich |  |
| Rev qPCR primer for WAC<br>TTTGGCCTTACTGTGACCTGT                  | Sigma-<br>Aldrich |  |
| Forward qPCR primer for NAA50<br>TGGCACCTTACCGAAGGCTA             | Sigma-<br>Aldrich |  |
| Rev qPCR primer for NAA50<br>TTGCCGACTCATTGCTGATCT                | Sigma-<br>Aldrich |  |
| Forward qPCR primer for SLMO2<br>CCCAAACCCTATGAACCCAAG            | Sigma-<br>Aldrich |  |
| Rev qPCR primer for SLMO2<br>TGTGCAACTTTCCAGAGGG                  | Sigma-<br>Aldrich |  |
| Forward qPCR primer for PURB<br>GCCATCACCGTACCCTTCAA              | Sigma-<br>Aldrich |  |
| Rev qPCR primer for PURB<br>CCCTCTGTCGTTCTGGATTT                  | Sigma-<br>Aldrich |  |
|                                                                   |                   |  |

| Recombinant DNA                            |                                 |                                                                                                             |
|--------------------------------------------|---------------------------------|-------------------------------------------------------------------------------------------------------------|
| pFRT-FlagHA-DHX36-iso1                     |                                 | This study                                                                                                  |
| pFRT-FlagHA-DHX36-iso1-E335A               |                                 | This study                                                                                                  |
| pFRT-FlagHA-DHX36-iso2                     |                                 | This study                                                                                                  |
| pFRT-FlagHA-DHX36-iso2-E335A               |                                 | This study                                                                                                  |
| pOG44 Flp Recombinase Expression<br>Vector | Thermo<br>Fisher Scientific     | Cat#:<br>V600520                                                                                            |
| Software and Algorithms                    |                                 |                                                                                                             |
| Tophat 2                                   | CCB Johns<br>Hopkins University | <a href="http://ccb.jhu.edu/software/tophat/index.shtml">http://ccb.jhu.edu/software/tophat/index.shtml</a> |
| Cufflinks                                  | CCB Johns<br>Hopkins University | <a href="http://cole-trapnell-lab.github.io/cufflinks/">http://cole-trapnell-lab.github.io/cufflinks/</a>   |
| RNAcounter                                 | EPF<br>Lausanne                 | <a href="https://pypi.python.org/pypi/rnacounter">https://pypi.python.org/pypi/rnacounter</a>               |
| PARpipe                                    | Ohler lab,<br>MDC Berlin        | <a href="https://github.com/ohlerlab/PARpipe">https://github.com/ohlerlab/PARpipe</a>                       |



|                                                          |                                                             |                    |
|----------------------------------------------------------|-------------------------------------------------------------|--------------------|
| MaxQuant version 1.5.7.4                                 | Max-Planck<br>Institute for<br>Biochemistry,<br>Martinsried |                    |
| MO Affinity analysis software                            | NanoTemper<br>Technologies                                  |                    |
| Other                                                    |                                                             |                    |
| DMEM, high glucose, no glutamine, no lysine, no arginine | Thermo<br>Fisher Scientific                                 | Cat#:<br>A1443101  |
| DPBS, no calcium, no magnesium                           | Thermo<br>Fisher Scientific                                 | Cat#:<br>14190094  |
| Fetal Bovine Serum                                       | Thermo<br>Fisher Scientific                                 | Cat#:<br>10270106  |
| Fetal Bovine Serum, dialyzed                             | Thermo<br>Fisher Scientific                                 | Cat#:<br>26400036  |
| Trypsin-EDTA (0.25%), phenol red                         | Thermo<br>Fisher Scientific                                 | Cat#:<br>25200056  |
| L-Glutamine (200 mM)                                     | Thermo<br>Fisher Scientific                                 | Cat#:<br>250300024 |
| Penicillin-Streptomycin (10,000 U/ml)                    | Thermo<br>Fisher Scientific                                 | Cat#:<br>15140122  |
| NuPAGE 4-13% Bis-Tris Protein Gels                       | Thermo<br>Fisher Scientific                                 | Cat#:<br>NP0321BOX |

375 **Cell Lines**

376 HEK293 T-REx Flp-In cells were grown in Dulbecco's modified Eagle's medium (DMEM)  
377 supplemented with 10% (v/v) fetal bovine serum (FBS), 100 U ml<sup>-1</sup> Penicillin-Streptomycin, 100  
378 µg ml<sup>-1</sup> zeocin, and 10 µg ml<sup>-1</sup> blasticidin.

379 **Constructs**

380 Plasmid constructs were generated by standard restriction cloning of a HEK293-cDNA-derived  
381 DHX36 insert using BamHI and XhoI. For mutations, standard mutagenesis PCRs were carried  
382 out. Used primers are listed in the Resource Table.

383 **Cell Cultures**

384 Stable Flp-In T-REx HEK293 cell lines inducibly expressing FlagHA-DHX36-Iso1, FlagHA-DHX36-Iso2,  
385 FlagHA-DHX36-Iso1-catalytic-dead, or FlagHA-DHX36-Iso2-catalytic-dead were generated as  
386 previously described (Spitzer et al., 2013). Essentially, DHX36-Iso1 was cloned from HEK293 cDNA  
387 into pFRT/TO/FLAG/HA-Dest plasmid using the restriction enzymes BamHI and XhoI (Landthaler et  
388 al., 2008). Based on the so-created pFRT/TO/FLAG/HA-DHX36-Iso1, plasmids for FlagHA-DHX36-  
389 Iso2, FlagHA-DHX36-Iso1-catalytic-dead, FlagHA-DHX36-Iso2-catalytic-dead were generated by  
390 site-directed mutagenesis. All primer used in this study are listed in the Key Resource Table.

391 Co-transfection of these plasmid together with pOG44 plasmid using Nanofectin resulted in  
392 stable cell lines selected and grown DMEM supplemented with 10% (v/v) FBS, 100 µg ml<sup>-1</sup>  
393 hygromycin B, and 10 µg ml<sup>-1</sup> blasticidin.

394 **Subcellular Fractionation**

395 Transgene expression in FlagHa-DHX36-Iso1 and -Iso2 HEK293 cells was induced by addition  
396 of 500 ng ml<sup>-1</sup> tetracycline (Sigma Aldrich) for 15 hours. After washing with ice-cold PBS,  
397 induced 100% confluent cells were scrapped off the 14.5-cm cell culture plate using a rubber  
398 policeman and collected by centrifugation. Unless otherwise stated, cell fractionation was

399 performed as described by Gagnon et al. (Gagnon et al., 2014). In detail, pelleted cells were  
400 resuspended in 1 ml of hypotonic lysis buffer (HLB) (10 mM Tris, pH7.5, 10 mM NaCl, 3 mM  
401 MgCl<sub>2</sub>, 0.3% (v/v) NP-40, 10% (v/v) glycerol) per 75 mg cell pellet. After 10 min incubation on  
402 ice, cell suspension was briefly vortexed followed by 8 min centrifugation at 800 g and 4°C. The  
403 cytoplasmic fraction (supernatant) was thoroughly transferred to a new tube and 5 M NaCl was  
404 added to a final concentration of 150 mM. The remaining nuclear fraction (pellet) was carefully  
405 washed four times with HLB (and collected after each wash by 2min centrifugation at 200 g and  
406 4°C). After washing, the pellet was resuspended in nuclear lysis buffer (NLB) (20 mM Tris,  
407 pH7.5, 150 mM KCl, 3 mM MgCl<sub>2</sub>, 0.3% (v/v) NP-40, 10% (v/v) glycerol) and sonicated for 2  
408 cycles (40% power, 30 s ON, 2 min OFF). Both the cytosolic and the nuclear fraction were 15  
409 min centrifuged at 18000 g and 4°C to remove all debris. Obtained supernatants were subject of  
410 further investigation by standard Western blotting. Used markers for subcellular compartments:  
411 nuclear = anti-Histone 2B antibody, cytosolic = anti- $\alpha$ -Tubulin antibody, endoplasmic reticulum  
412 membrane = anti-Calnexin antibody.

### 413 **RNA-seq**

414 In triplicates, RNA from HEK293 T-Rex Flp-In wildtype cells and HEK293 T-Rex Flp-In DHX36  
415 KO cells was isolated with TRIzol reagent according to the manufacturer's instructions.  
416 Depletion of ribosomal RNA was accomplished by using the NEBNext rRNA Depletion Kit.  
417 cDNA preparation out of resulting RNA was done with the NEBnext Ultra Directional RNA  
418 Library Prep Kit for Illumina. cDNA enrichment was facilitated using indexed primers of the  
419 NEBNext Multiplex Oligos for Illumina and sequencing was performed on an Illumina HiSeq  
420 2500 platform. Sequencing reads were aligned to the hg19 human genome using Tophat 2  
421 (Trapnell et al., 2012). Cufflinks (Trapnell et al., 2012) was used to quantify reads on the UCSC  
422 hg19 annotation set differential expression was determined by Cuffdiff (Trapnell et al., 2012).

## 423 **Ribosome footprinting**

424 Ribosome footprinting was performed as published by Ingolia et al (Ingolia et al., 2012). Briefly,  
425 triplicates for both HEK293 T-REx Flp-In wildtype cells and HEK293 T-Rex Flp-In DHX36 KO  
426 cells were grown to 80% confluency on 10 cm cell culture plates. For inhibition of translation,  
427 standard growth media was changed to growth media containing 100 µg/ml cycloheximide  
428 (CHX). After 30 sec media was aspirated and plates were immediately cooled down on ice and  
429 washed with ice-cold PBS. 400 µl of ribosome footprinting buffer (20 mM Tris, pH7.4, 150 mM  
430 NaCl, 4 mM MgCl<sub>2</sub>, 1 mM DTT, 100 µg/ml CHX, 1% NP-40, 25 U/ml Turbo DNase I) were  
431 added, cells were scrapped off the plate using a rubber policeman and collected in pre-chilled  
432 1.5 ml microcentrifuge tubes. After 10 min incubation on ice, lysates were triturated by passing  
433 10x through a 26-G-needle and cleared by 10 min centrifugation at 20000 g and 4°C. For  
434 digestion of unbound RNA, 300 µl of cell extract was treated with 2.5 U/µl RNase I and  
435 incubated at room temperature for 45 min with gentle mixing. RNase digestion was stopped by  
436 adding 0.65 U/µl SUPERaseIn and extract was ultracentrifuged through a 900 µl sucrose  
437 cushion (20 mM Tris, pH7.4, 150 mM NaCl, 4 mM MgCl<sub>2</sub>, 1 mM DTT, 100 µg/ml CHX, 1 M  
438 sucrose, 20 U/ml SUPERaseIn) for 4 hours at 70000 rpm (TLA 100.3 rotor) and 4°C. The  
439 supernatant was carefully aspirated and ribosome-containing pellet was resuspendend in 150 µl  
440 of ribosome footprinting buffer supplemented with 20 U/ml SUPERaseIn. RNA footprints were  
441 purified by phenol-chloroform extraction and precipitated with ethanol. After washing twice with  
442 75% ethanol, the air-dried RNA pellet was resolved in 15 µl DEPC-treated water. Small RNA  
443 cDNA libraries for next-generation sequencing were prepared as previously described (Hafner  
444 et al., 2012b) with following modifications: firstly, for dephosphorylation 500 ng RNA were  
445 incubated 30 min at 37°C with 0.7 U/µl calf intestinal phosphatase (CIP) in 1x CutSmart buffer.  
446 Afterwards, samples were separated on a 15% urea-PAGE for exclusion of CIP and selection of  
447 20-35 ribonucleotide long fragments. Extracted, precipitated and washed RNA fragments were  
448 ligated with preadenylated, barcoded 3' adapters. Next, RNA was precipitated, washed and

449 phosphorylated at the 5' end with 5 U/ $\mu$ l T4 polynucleotide kinase in 1x T4 DNA ligase buffer (20  
450  $\mu$ l reaction volume) for 30 min at 37°C. Samples were separated on a 15% urea-PAGE for  
451 exclusion of PNK and selection of 3' ligated fragments. Extracted, precipitated and washed RNA  
452 was ligated with 5' adapters and samples were separated on a 12% urea-PAGE for selection of  
453 5' and 3' ligated fragments. After reverse transcription and cDNA library enrichment, samples  
454 were sequenced on an Illumina HiSeq 2500 platform.

455 After sequencing the reads were aligned to the human genome version hg19 using  
456 TopHat (Trapnell et al., 2012) and quantified on RNA defined in the UCSC hg19 annotation  
457 database using Cufflinks (Trapnell et al., 2012). Overlaps of DHX36 cluster and different  
458 genomic regions were calculated with BEDTools (Quinlan and Hall, 2010).

#### 459 **PAR-CLIP**

460 Photoactivatable-Ribonucleoside-Enhanced Crosslinking and Immunoprecipitation (PAR-CLIP)  
461 was performed with minor modifications as described previously (Hafner et al., 2010; 2012a).  
462 Essential steps are described in the following. For cell lines (DHX36-Iso1/2/Iso1-catalytic-dead-  
463 HEK293) cells were grown on 15 14.5-cm cell culture plates to 80% confluency. Induction of  
464 transgene expression (addition of 500 ng ml<sup>-1</sup> tetracycline) was performed for 15 hours as well  
465 as feeding the cells with 100  $\mu$ M of either 4-thiouridin (4SU) or 6-thioguanosin (6SG). After  
466 washing with ice-cold PBS cells were crosslinked (irradiation with UV light of 365 nm for 5 min)  
467 and scrapped off the plate using a rubber policeman. After pelleting by centrifugation cells were  
468 resuspended in 7 ml NP-40 lysis buffer (50 mM HEPES, pH7.5, 150 mM KCl, 2 mM EDTA, 0.5  
469 mM DTT, 0.5% (v/v) NP-40, protease inhibitor cocktail) and incubated on ice for 12 min. Cell  
470 lysate was clarified by 15 min centrifugation at 20000 g and 4°C. First RNase T1 digestion  
471 (1U/ $\mu$ l) was performed for 15 min at 22°C. 75  $\mu$ l/ml FLAG-M2 antibody conjugated to magnetic  
472 Dynabeads<sup>TM</sup> Protein G were added. Antigen capture was performed for 105 min at 4°C on a  
473 rotating wheel. Beads were collected on a magnetic rack and washed 3x with NP-40 lysis buffer.

474 For trimming of the co-captured RNA, a second RNase T1 digestion (10U/μl) was performed for  
475 15 min at 22°C with occasional shaking. 3'ends of the RNA fragments were dephosphorylated  
476 using 0.5 U/μl calf intestinal phosphatase for 10 min at 37°C, shaking. RNA was radioactively  
477 5'end-labeled using 1 U/μl T4 polynucleotide kinase and 0.5 μCi/μl <sup>32</sup>P-γ-ATP for 30 min at  
478 37°C. Almost complete 5'end phosphorylation of RNA was accomplished by adding ATP to a  
479 concentration of 100 μM for 5 min. So-treated RNA-protein complexes were separated by SDS-  
480 Polyacrylamide gel electrophoresis (SDS-PAGE, 4-12% NuPAGE). For detection, a blanked  
481 storage phosphor screen (GE Healthcare) was exposed to the gel and RNA protein complexes  
482 of expected size were excised. After gel elution, protein components of the complexes were  
483 digested with 5 mg/ml proteinase K for 2 hours at 55°C. Resulting RNA fragments were isolated  
484 by phenol-chloroform-isoamyl alcohol (25:24:1) extraction and subject of a small RNA cDNA  
485 library preparation protocol as previously described (Hafner et al., 2012b). Here, a  
486 preadenylated, barcoded 3'adapter oligonucleotide (rApp-  
487 TAATATCGTATGCCGTCTTCTGCTTG) was used.

488 So-obtained PAR-CLIP cDNA libraries were sequenced on an Illumina HiSeq 2500  
489 platform. Clusters of overlapping sequence reads mapped against the human genome version  
490 hg19 were generated using the PARalyzer software (Corcoran et al., 2011) incorporated into a  
491 pipeline (PARpipe; [https://ohlerlab.mdc-berlin.de/software/PARpipe\\_119/](https://ohlerlab.mdc-berlin.de/software/PARpipe_119/)) with default settings.  
492 Binding sites were categorized using the Gencode GRCh37.p13 GTF annotation  
493 ([gencode.v19.chr\\_patch\\_hapl\\_scaff.annotation.gtf](http://www.gencodegenes.org/releases/19.html),  
494 <http://www.gencodegenes.org/releases/19.html>).

### 495 **Circular Dichroism**

496 For G-quadruplex formation, 100 μM oligodeoxynucleotides in folding buffer (10 mM Tris, pH7.5,  
497 100 mM KCl, 1 mM EDTA) were incubated for 10 min at 95°C, followed by subsequent passive  
498 cooling to RT. CD measurement was performed using a Jasco J-810 spectropolarimeter in 0.2

499 ml quartz cuvettes. Measurements in the range of 200-350 nm were recorded. Measurements  
500 were averaged between ten accumulations with an instrument scanning speed of 10 nm/sec.  
501 Oligodeoxynucleotides used in this experiment were purchased from Sigma-Aldrich.

## 502 **Growth curves**

503 Regular grown HEK293 T-REx Flp-In wildtype cells and HEK293 T-Rex Flp-In DHX36 KO cells  
504 were trypsinized, counted and  $0.1 \times 10^6$  cells were seeded in 35 mm cell culture plates. At  
505 indicated timepoints, cells were counted in triplicates using a Fuchs-Rosenthal-hemocytometer.

## 506 **SILAC**

507 In duplicates, HEK293 T-REx Flp-In wildtype cells and HEK293 T-Rex Flp-In DHX36 KO cells  
508 were grown to approximately 60% confluency on 35 mm cell culture plates. Then, cells were fed  
509 with light media (DMEM, 10% dialyzed FBS, 4 mM glutamine, 1.74 mM L-proline, 0.8 mM L-  
510 lysine, 0.4 mM L-arginine). 24 hours later, cells were washed twice with pre-warmed PBS and  
511 wildtype cells were changed to medium-heavy media (DMEM, 10% dialyzed FBS, 4 mM  
512 glutamine, 1.74 mM L-proline, 0.8 mM L-lysine [4,4,5,5-D<sub>4</sub>], 0.4 mM L-arginine [U-13C<sub>6</sub>]) and  
513 KO cells to heavy media (DMEM, 10% dialyzed FBS, 4 mM glutamine, 1.74 mM L-proline, 0.8  
514 mM L-lysine [U-13C<sub>6</sub>, 15N<sub>2</sub>], 0.4 mM L-arginine [U-13C<sub>6</sub>, 15N<sub>4</sub>]). 24 hours later, cells were  
515 washed twice with pre-warmed PBS and cells were collected in 100  $\mu$ l NP-40 lysis buffer (50  
516 mM HEPES, pH7.5, 150 mM KCl, 2 mM EDTA, 0.5 mM DTT, 0.5% (v/v) NP-40, protease  
517 inhibitor cocktail). After incubation for 10 min on ice, lysates were cleared by 15 min  
518 centrifugation at 20000g and 4°C. Protein concentration was assessed by standard Bradford  
519 assay.

520 For in-gel digestion proteins were reduced and alkylated prior to SDS-PAGE by heating  
521 the cell lysates for 10 min at 70°C in NuPAGE LDS sample buffer (Life Technologies)  
522 supplemented with 50 mM DTT. Samples were alkylated by adding 120 mM iodoacetamide

523 Simply Blue (Life Technologies). Whole lanes were cut into 15 bands. The bands were  
524 destained with 30% acetonitrile, shrunk with 100% acetonitrile, and dried in a vacuum  
525 concentrator. Digests with 0.1 µg trypsin (Promega) per gel band were performed overnight at  
526 37°C in 50 mM ammonium bicarbonate (ABC) buffer. Peptides were extracted from the gel  
527 slices with 5% formic acid. NanoLC-MS/MS analyses were performed on an Orbitrap Fusion  
528 (Thermo Scientific) equipped with an EASY-Spray Ion Source or a PicoView Ion Source (New  
529 Objective) and coupled to an EASY-nLC 1000 (Thermo Scientific). Using the Easy-Spray Ion  
530 Source the peptides were loaded on a trapping column (2 cm × 75 µm ID, PepMap C18, 3 µm  
531 particles, 100 Å pore size) and separated on an EASY-Spray column (25 cm × 75 µm ID,  
532 PepMap C18, 2 µm particles, 100 Å pore size). Using the PicoView Ion Source the peptides  
533 were loaded on capillary columns (PicoFrit, 30 cm x 150 µm ID, New Objective) self-packed with  
534 ReproSil-Pur 120 C18-AQ, 1.9 µm (Dr. Maisch). A 60-minute linear gradient from 3% to 40%  
535 acetonitrile and 0.1% formic acid was used. Both MS and MS/MS scans were acquired in the  
536 Orbitrap analyzer with a resolution of 60,000 for MS scans and 15,000 for MS/MS scans. HCD  
537 fragmentation with 35% normalized collision energy was applied. A Top Speed data-dependent  
538 MS/MS method with fixed cycle time of 3 seconds was used. Dynamic exclusion was applied  
539 with a repeat count of 1 and exclusion duration of 120 s; singly charged precursors were  
540 excluded from selection. Minimum signal threshold for precursor selection was set to 50,000.  
541 Predictive AGC was used with an AGC target value of 5e5 for MS scans and 5e4 for MS/MS  
542 scans. EASY-IC was used for internal calibration.

543 For MS raw data file processing, database searches and quantification, MaxQuant  
544 version 1.5.7.4 (Cox and Mann, 2008) was used. UniProt human reference proteome database  
545 was used in combination with a database containing common contaminants as a reverse  
546 concatenated target-decoy database. Protein identification was under control of the false-  
547 discovery rate (<1% FDR on protein and peptide level). In addition to MaxQuant default  
548 settings, the search was performed with tryptic cleavage specificity with three allowed missed



549 cleaves. The search was performed with the following variable modifications: Gln to pyro-Glu  
550 formation and oxidation (on Met). Normalized H/M ratios were used for protein quantitation (at  
551 least two peptides per protein

## 552 **Polysome profiling**

553 HEK293 T-REx Flp-In wildtype cells were grown on a 14.5 cm cell culture plate to 90-100%  
554 confluency. Then, growth media was change to media containing 25 µg/ml cycloheximide. After  
555 10 min incubation, cells were washed once with ice-cold PBS and 100 µl of polysome lysis  
556 buffer (20 mM Tris, pH7.5, 100 mM KCl, 5 mM MgCl<sub>2</sub>, 1 mM DTT, 0.5% (v/v) NP-40, 100 µg/ml  
557 cycloheximide, 20 U/ml SUPERaseIn, protease inhibitor cocktail) were added (note: for samples  
558 used for RNase-treated lysates, no SUPERaseIn was added). Cells were scrapped of the plate  
559 using a rubber policeman and transferred to a pre-chilled 1.5 microcentrifuge tube. After 10 min  
560 incubation on ice for lysis, lysate was cleared by 10 min centrifugation at 20000 g and 4°C.  
561 Clarified lysate was loaded onto a 5-45% linear sucrose gradient (sucrose in 20 mM Tris, pH7.5,  
562 100 mM KCl, 5 mM MgCl<sub>2</sub>) and ultracentrifuged for 60 min in a SW60Ti rotor (Beckman) at  
563 38000 rpm and 4°C. During fractionation performed using a Gradient fractionator (Biocomp) the  
564 UV profile (254 nm) was measured. Obtained fractions were further analyzed by standard  
565 Western blot.

## 566 **Light microscopy imaging**

567 Regular grown HEK293 T-REx Flp-In wildtype cells and HEK293 T-Rex Flp-In DHX36 KO cells  
568 were trypsinized, counted and  $1.2 \times 10^6$  cells were seeded in 60 mm cell culture plates.  
569 Microscopic images were taken 24, 48, 72, and 96 hours after seeding using a EVOS FL cell  
570 imaging system.

## 571 **CRISPR/Cas9 Gene Editing**

572 crRNAs were designed using <https://benchling.com>. Alt-R crRNA was ordered from IDT. 100  
573 pmol Alt-R crRNA and 100 pmol Alt-R tracrRNA-ATTO 550 were denatured at 95°C for 5 min  
574 and incubated at RT for 15 min to anneal both strands in a total volume of 100 µl in Nuclease-  
575 Free Duplex Buffer (IDT). 15 pmol annealed RNA was combined with 16 pmol Cas9 (IDT) and 5  
576 µl Cas9+ reagent (Invitrogen) in Opti-MEM (Gibco) in a total volume of 150 µl and mixed well. In  
577 a second tube 125 µl Opti-MEM was combined with 7.5 µl CRISPRMAX (Invitrogen) and mixed  
578 well. After incubation at RT for 5 min the tubes were combined, mixed well, and formed complex  
579 was transferred to a 6-well compartment containing HEK293T cells. The HEK293T cells were  
580 seeded the previous day at a density of  $4 \times 10^5$  cells/ml. After 48 hr ATTO 550 positive cells  
581 were FACS sorted and seeded at the density of up to 1 cell per well in a 96 well plate using a  
582 standard medium. Single clones were expanded and analyzed for loss of protein by Western  
583 blot using anti-DHX36 antibodies.

#### 584 **cPDS-seq**

585 HEK293 T-REx Flp-In wildtype cells were grown to approximately 50% confluency on 35 mm  
586 cell culture plates. Then in triplicates, growth media was changed to standard media or media  
587 containing 2 µM carboxy-pyridostatin. After 42 h incubation, cells were collected and total RNA  
588 was isolated using TRIzol according to the manufacturer's instructions. Depletion of ribosomal  
589 RNA was accomplished by using the NEBNext rRNA Depletion Kit (NEB). cDNA preparation out  
590 of resulting RNA was done with the NEBnext Ultra Directional RNA Library Prep Kit for Illumina  
591 (NEB). cDNA enrichment was facilitated using indexed primers of the NEBNext Multiplex Oligos  
592 for Illumina (NEB) and sequencing was performed on an Illumina HiSeq 3000 platform.  
593 Sequencing reads were aligned to the hg19 human genome using Tophat 2. quantified on RNA  
594 defined in the UCSC hg19 annotation database using Cufflinks (Trapnell et al., 2012).

#### 595 **Isolation of chromatin-associated RNA**

596 In triplicates, standardized cultured HEK293 T-REx Flp-In wildtype cells and HEK293 T-Rex Flp-  
597 In DHX36 KO cells were grown on 14.5 cm plates to 80-90% confluency. After collecting the  
598 cells by centrifugation. Obtained pellets were washed once with ice-cold PBS and transferred to  
599 pre-chilled 1.5 ml microcentrifuge tube. Cells were resuspended in 400  $\mu$ l ice-cold Cytoplasmic  
600 Fraction Buffer (20 mM HEPES, pH7.6, 2 mM  $MgCl_2$ , 10% (v/v) glycerol, 0.5 mM DTT, 0.1%  
601 (v/v) NP-40, protease inhibitor cocktail, 40 U/ml Murine RNase Inhibitor (NEB)) and incubated  
602 on ice for 5 min. Crude lysates were layered on a 400  $\mu$ l sucrose buffer cushion (10 mM  
603 HEPES, pH7.6, 10 mM NaCl, 1.5 mM  $MgCl_2$ , 10% (v/v) glycerol, 37% (w/v) sucrose, 0.5 mM  
604 EDTA; 0.5 mM DTT, protease inhibitor cocktail, 40 U/ml Murine RNase Inhibitor (NEB)) and  
605 centrifuged for 20 min at 20000 g and 4°C. Resulting supernatant, representing the cytoplasmic  
606 fraction was collected and the pellet was resuspendend in 200  $\mu$ l ice-cold Nuclear Lysis Buffer  
607 (10 mM HEPES, pH7.6, 100 mM NaCl, 50% (v/v) glycerol, 0.5 mM EDTA; 0.5 mM DTT,  
608 protease inhibitor cocktail, 40 U/ml Murine RNase Inhibitor (NEB)). 200  $\mu$ l ice-cold 2x NUN-  
609 Buffer (50 mM HEPES, pH7.6, 600 mM NaCl, 7.5 mM  $MgCl_2$ , 2 M urea, 0.2 mM EDTA; 0.5 mM  
610 DTT, 2% (v/v) NP-40) were added dropwise, followed by a pulsed vortexing and incubation on  
611 ice for 20 min. After 30 min centrifugation at 20000 g and 4°C, resulting supernatant  
612 (nucleoplasmic fraction) was collected and the pellet (chromatin), after washing with 1 ml  
613 Nuclear Lysis Buffer, was resuspended in 1 ml Trizol. Solutions were heated to 65°C and run  
614 through a G26-needle until no insoluble objects were visible. Chromatin-associated RNA was  
615 isolated according to the manufacturer's instructions for Trizol-based RNA isolation. cDNA  
616 preparation out of resulting RNA was done with the NEBnext Ultra Directional RNA Library Prep  
617 Kit for Illumina (NEB). cDNA enrichment was facilitated using indexed primers of the NEBNext  
618 Multiplex Oligos for Illumina (NEB) and sequencing was performed on an Illumina HiSeq 3000  
619 platform. Sequencing reads were aligned to the hg19 human genome using Tophat 2. quantified  
620 on RNA defined in the UCSC hg19 annotation database using Cufflinks (Trapnell et al., 2012).

621 **Actinomycin D mRNA stability assay**

622 HEK293 T-Rex Flp-In wildtype cells and HEK293 T-Rex Flp-In DHX36 KO cells were grown on  
623 35 mm plates to 80% confluency. At timepoint T=0, media was changed to media containing 3  
624 µg/ml Actinomycin D. Cells were collected by trypsinization on timepoints 0 h, 2 h, 4 h, and 8 h  
625 after addition of Actinomycin D. Total RNA was isolated using TRIZOL according to the  
626 manufacturer's instructions. Isolated RNA was reverse-transcribed using the QuantiTect  
627 Reverse Transcription Kit (Qiagen). Quantification of target mRNA levels was done by qPCR  
628 using gene specific primer on a CFX96 Real Time System with a C1000 Touch Thermal Cycler  
629 (Biorad). For normalization primer specific for U6 RNA was used. Data were analyzed using the  
630 CFX Manager Software (Biorad).

631 **Purification of FH-DHX36**

632 Expression of the FH-DHX36 transgene was induced 36 h before harvesting with 500 ng ml<sup>-1</sup>  
633 tetracycline. After washing 3x with ice-cold PBS, cells were and scrapped off the plate using a  
634 rubber policeman and collected by centrifugation, followed by 10 min lysis on ice with NP40  
635 lysis buffer (50 mM HEPES, pH 7.5, 150 mM KCl, 2 mM EDTA, 0.5 mM DTT, 0.5% (v/v) NP-40,  
636 protease inhibitor cocktail). Obtained crude lysate was run 10x through a G26-needle and  
637 insoluble cell debris were removed by centrifugation. In lysis buffer calibrated Anti-Flag M2  
638 Magnetic beads (Sigma) were added and incubated for 5 h on a head-over-tail wheel at 4°C.  
639 Beads were collected on a magnetic rack and washed 3x with IP wash buffer (50 mM Tris-HCl,  
640 pH 7.5, 300 mM NaCl, 0.1% NP40, 5 mM EDTA). FH-DHX36 was eluted with 0.1 mg/ml FLAG  
641 peptide in elution buffer (10 mM Tris-HCl, pH 7.5 and 150 mM NaCl).

642 **Microscale thermophoresis (MST)**

643 For microscale thermophoresis, binding reactions were prepared in 1x MST buffer,  
644 supplemented with 0,5% BSA and 5 mM DTT in a total volume of 40 µl. A constant

645 concentration of 25 nM 5'Cy5 labeled oligonucleotides (folded) were used (see Resource  
646 Table). A 1:1 serial dilution of purified DHX36, with 50 nM as highest concentration was used. In  
647 standard treated capillaries (NanoTemper Technologies) microscale thermophoresis analysis  
648 was performed with 80% LED, 20% MST power, on the Monolith NT.115 (NanoTemper  
649 Technologies). Figures were made with Hill fit using the MO Affinity analysis software.

### 650 **5mer Z-scoring**

651 The BEDTools utility, *getfasta*, was used to recover the genomic nucleotide sequences  
652 corresponding to the remaining intervals in these BED files. To produce background, we used  
653 an in-house script to scramble the target read sequences while preserving GC content. We then  
654 counted the 5mers for target and for background respectively and calculated Z-score  
655 enrichment by proportion,  $Z = \frac{X - \mu}{\sigma}$ . X is the proportion  $\frac{\text{count}}{\text{total counts}}$  for a given 5mer.  
656 Respectively,  $\mu$  and  $\sigma$  are the average and standard deviation of 5mer proportions in  
657 background.

658

659

660 **ACCESSION CODES**

661 The PAR-CLIP, ribosome footprinting, and RNA-seq sequence data have been deposited in the  
662 National Center for Biotechnology Information (NCBI) Sequence Read Archive under the  
663 accession number GSE105175.

664

665 **ACKNOWLEDGMENTS**

666 Research in the Paeschke laboratory is supported by the Emmy-Noether Program of the  
667 Deutsche Forschungsgemeinschaft as well as an ERC Stg Grant (638988-G4DSB). Work in the  
668 Hafner laboratory was supported by the Intramural Research Program of the National Institute  
669 for Arthritis and Musculoskeletal and Skin Disease. We thank the NIAMS Genomics Core  
670 Facility and Gustavo Gutierrez-Cruz and Dr. Stefania Dell'Orso (NIAMS/NIH) for sequencing  
671 support and Dr. Suman Ghosal (NIAMS/NIH) for binding motif analysis. We thank Dr. Andreas  
672 Schlosser for Mass Spectrometry analysis of SILAC experiments and the iPSC/CRISPR Centre  
673 (UMCG/ERIBA) for creating the DHX36-KO cell line. We thank Dr. Alexander Buchberger  
674 (University of Würzburg) for generous help and support during the whole period of this project  
675 and Maria Gallant and Eike Schwindt for experimental support. We thank Dr. Henrike Maatz  
676 (MDC Berlin) and Dr. Satyaprakash Pandey (ERIBA, Groningen) for carefully reading of the  
677 manuscript.

678 **REFERENCES**

- 679 Ascano, M., Jr, Mukherjee, N., Bandaru, P., Miller, J.B., Nusbaum, J.D., Corcoran, D.L.,  
680 Langlois, C., Munschauer, M., Dewell, S., Hafner, M., Williams, Z., Ohler, U., Tuschl, T.,  
681 Tuschl, T., 2012. FMRP targets distinct mRNA sequence elements to regulate protein  
682 expression. *Nature* 492, 382–386. doi:10.1038/nature11737
- 683 Bailey, T.L., Boden, M., Buske, F.A., Frith, M., Grant, C.E., Clementi, L., Ren, J., Li, W.W.,  
684 Noble, W.S., 2009. MEME SUITE: tools for motif discovery and searching. *Nucleic Acids*  
685 *Research* 37, W202–8. doi:10.1093/nar/gkp335
- 686 Baird, S.D., Turcotte, M., Korneluk, R.G., Holcik, M., 2006. Searching for IRES. *RNA* 12, 1755–  
687 1785. doi:10.1261/rna.157806
- 688 Bazzini, A.A., Lee, M.T., Giraldez, A.J., 2012. Ribosome profiling shows that miR-430 reduces  
689 translation before causing mRNA decay in zebrafish. *Science* 336, 233–237.  
690 doi:10.1126/science.1215704
- 691 Beaudoin, J.-D., Perreault, J.-P., 2013. Exploring mRNA 3'-UTR G-quadruplexes: evidence of  
692 roles in both alternative polyadenylation and mRNA shortening. *Nucleic Acids Research* 41,  
693 5898–5911. doi:10.1093/nar/gkt265
- 694 Benhalevy, D., Gupta, S.K., Danan, C.H., Ghosal, S., Sun, H.-W., Kazemier, H.G., Paeschke,  
695 K., Hafner, M., Juranek, S.A., 2017. The Human CCHC-type Zinc Finger Nucleic Acid-  
696 Binding Protein Binds G-Rich Elements in Target mRNA Coding Sequences and Promotes  
697 Translation. *CellReports* 18, 2979–2990. doi:10.1016/j.celrep.2017.02.080
- 698 Bochman, M.L., Paeschke, K., Zakian, V.A., 2012. DNA secondary structures: stability and  
699 function of G-quadruplex structures. *Nature Reviews Genetics* 13, 770–780.  
700 doi:10.1038/nrg3296
- 701 Bonnal, S., Schaeffer, C., Créancier, L., Clamens, S., Moine, H., Prats, A.-C., Vagner, S., 2003.  
702 A single internal ribosome entry site containing a G quartet RNA structure drives fibroblast  
703 growth factor 2 gene expression at four alternative translation initiation codons. *J. Biol.*  
704 *Chem.* 278, 39330–39336. doi:10.1074/jbc.M305580200
- 705 Booy, E.P., Howard, R., Marushchak, O., Ariyo, E.O., Meier, M., Novakowski, S.K., Deo, S.R.,  
706 Dzananovic, E., Stetefeld, J., McKenna, S.A., 2014. The RNA helicase RHAU (DHX36)  
707 suppresses expression of the transcription factor PITX1. *Nucleic Acids Research* 42, 3346–  
708 3361. doi:10.1093/nar/gkt1340
- 709 Booy, E.P., Meier, M., Okun, N., Novakowski, S.K., Xiong, S., Stetefeld, J., McKenna, S.A.,  
710 2012. The RNA helicase RHAU (DHX36) unwinds a G4-quadruplex in human telomerase  
711 RNA and promotes the formation of the P1 helix template boundary. *Nucleic Acids*  
712 *Research* 40, 4110–4124. doi:10.1093/nar/gkr1306
- 713 Byrd, A.K., Zybailov, B.L., Maddukuri, L., Gao, J., Marecki, J.C., Jaiswal, M., Bell, M.R., Griffin,  
714 W.C., Reed, M.R., Chib, S., Mackintosh, S.G., Macnicol, A.M., Baldini, G., Eoff, R.L.,  
715 Raney, K.D., 2016. Evidence That G-quadruplex DNA Accumulates in the Cytoplasm and  
716 Participates in Stress Granule Assembly in Response to Oxidative Stress. *J. Biol. Chem.*  
717 291, 18041–18057. doi:10.1074/jbc.M116.718478
- 718 Cammas, A., Dubrac, A., Morel, B., Lamaa, A., Touriol, C., Teulade-Fichou, M.-P., Prats, H.,  
719 Millevoi, S., 2015. Stabilization of the G-quadruplex at the VEGF IRES represses cap-  
720 independent translation. *RNA Biol.* 12, 320–329. doi:10.1080/15476286.2015.1017236
- 721 Chalupníková, K., Lattmann, S., Selak, N., Iwamoto, F., Fujiki, Y., Nagamine, Y., 2008.  
722 Recruitment of the RNA helicase RHAU to stress granules via a unique RNA-binding  
723 domain. *J. Biol. Chem.* 283, 35186–35198. doi:10.1074/jbc.M804857200
- 724 Corcoran, D.L., Georgiev, S., Mukherjee, N., Gottwein, E., Skalsky, R.L., Keene, J.D., Ohler, U.,  
725 2011. PARalyzer: definition of RNA binding sites from PAR-CLIP short-read sequence data.  
726 *Genome Biology* 12, R79. doi:10.1186/gb-2011-12-8-r79
- 727 Cox, J., Mann, M., 2008. MaxQuant enables high peptide identification rates, individualized



- 728 p.p.b.-range mass accuracies and proteome-wide protein quantification. *Nat. Biotech.* 26,  
729 1367–1372. doi:10.1038/nbt.1511
- 730 Creacy, S.D., Routh, E.D., Iwamoto, F., Nagamine, Y., Akman, S.A., Vaughn, J.P., 2008. G4  
731 resolvase 1 binds both DNA and RNA tetramolecular quadruplex with high affinity and is the  
732 major source of tetramolecular quadruplex G4-DNA and G4-RNA resolving activity in HeLa  
733 cell lysates. *J. Biol. Chem.* 283, 34626–34634. doi:10.1074/jbc.M806277200
- 734 Endoh, T., Sugimoto, N., 2016. Mechanical insights into ribosomal progression overcoming  
735 RNA G-quadruplex from periodical translation suppression in cells. *Sci Rep* 6, 22719.  
736 doi:10.1038/srep22719
- 737 Fuller-Pace, F.V., 2013. DEAD box RNA helicase functions in cancer. *RNA Biol.* 10, 121–132.  
738 doi:10.4161/rna.23312
- 739 Gagnon, K.T., Li, L., Janowski, B.A., Corey, D.R., 2014. Analysis of nuclear RNA interference in  
740 human cells by subcellular fractionation and Argonaute loading. *Nat. Prot.* 9, 2045–2060.  
741 doi:10.1038/nprot.2014.135
- 742 Gao, J., Aksoy, B.A., Dogrusoz, U., Dresdner, G., Gross, B., Sumer, S.O., Sun, Y., Jacobsen,  
743 A., Sinha, R., Larsson, E., Cerami, E., Sander, C., Schultz, N., 2013. Integrative analysis of  
744 complex cancer genomics and clinical profiles using the cBioPortal. *Sci Signal* 6, p11–p11.  
745 doi:10.1126/scisignal.2004088
- 746 Gerstberger, S., Hafner, M., Hafner, M., Tuschl, T., 2014. A census of human RNA-binding  
747 proteins. *Nature Reviews Genetics* 15, 829–845. doi:10.1038/nrg3813
- 748 Guo, H., Ingolia, N.T., Weissman, J.S., Bartel, D.P., 2010. Mammalian microRNAs  
749 predominantly act to decrease target mRNA levels. *Nature* 466, 835–840.  
750 doi:10.1038/nature09267
- 751 Guo, J.U., Bartel, D.P., 2016. RNA G-quadruplexes are globally unfolded in eukaryotic cells and  
752 depleted in bacteria. *Science* 353, aaf5371–aaf5371. doi:10.1126/science.aaf5371
- 753 Hafner, M., Landthaler, M., Landthaler, M., Burger, L., Khorshid, M., Hausser, J., Berninger, P.,  
754 Rothballer, A., Ascano, M., Jr, Jungkamp, A.-C., Munschauer, M., Ulrich, A., Wardle, G.S.,  
755 Dewell, S., Zavolan, M., Zavolan, M., Tuschl, T., Tuschl, T., 2010. Transcriptome-wide  
756 identification of RNA-binding protein and microRNA target sites by PAR-CLIP. *Cell* 141,  
757 129–141. doi:10.1016/j.cell.2010.03.009
- 758 Hafner, M., Lianoglou, S., Tuschl, T., Tuschl, T., Betel, D., 2012a. Genome-wide identification of  
759 miRNA targets by PAR-CLIP. *Methods* 58, 94–105. doi:10.1016/j.ymeth.2012.08.006
- 760 Hafner, M., Renwick, N., Farazi, T.A., Mihailovic, A., Pena, J.T.G., Tuschl, T., 2012b. Barcoded  
761 cDNA library preparation for small RNA profiling by next-generation sequencing. *Methods*  
762 58, 164–170. doi:10.1016/j.ymeth.2012.07.030
- 763 Huang, W., Smaldino, P.J., Zhang, Q., Miller, L.D., Cao, P., Stadelman, K., Wan, M., Giri, B.,  
764 Lei, M., Nagamine, Y., Vaughn, J.P., Akman, S.A., Sui, G., 2012. Yin Yang 1 contains G-  
765 quadruplex structures in its promoter and 5'-UTR and its expression is modulated by G4  
766 resolvase 1. *Nucleic Acids Research* 40, 1033–1049. doi:10.1093/nar/gkr849
- 767 Hubstenberger, A., Courel, M., Bénard, M., Souquere, S., Ernoult-Lange, M., Chouaib, R., Yi,  
768 Z., Morlot, J.-B., Munier, A., Fradet, M., Daunesse, M., Bertrand, E., Pierron, G.,  
769 Mozziconacci, J., Kress, M., Weil, D., 2017. P-Body Purification Reveals the Condensation  
770 of Repressed mRNA Regulons. *Mol. Cell* 0, 144–157.e5. doi:10.1016/j.molcel.2017.09.003
- 771 Ingolia, N.T., Brar, G.A., Rouskin, S., McGeachy, A.M., Weissman, J.S., 2012. The ribosome  
772 profiling strategy for monitoring translation in vivo by deep sequencing of ribosome-  
773 protected mRNA fragments. *Nat. Prot.* 7, 1534–1550. doi:10.1038/nprot.2012.086
- 774 Ingolia, N.T., Ghaemmaghami, S., Newman, J.R.S., Weissman, J.S., 2009. Genome-wide  
775 analysis in vivo of translation with nucleotide resolution using ribosome profiling. *Science*  
776 324, 218–223. doi:10.1126/science.1168978
- 777 Ivanov, P., O'Day, E., Emara, M.M., Wagner, G., Lieberman, J., Anderson, P., 2014. G-  
778 quadruplex structures contribute to the neuroprotective effects of angiogenin-induced tRNA



- 779 fragments. *Proc. Natl. Acad. Sci.* 111, 18201–18206. doi:10.1073/pnas.1407361111
- 780 Jackson, R.J., Hellen, C.U.T., Pestova, T.V., 2010. The mechanism of eukaryotic translation  
781 initiation and principles of its regulation. *Nat. Rev. Mol. Cell. Biol.* 11, 113–127.  
782 doi:10.1038/nrm2838
- 783 Jankowsky, E., 2011. RNA helicases at work: binding and rearranging. *Trends Biochem. Sci.*  
784 36, 19–29. doi:10.1016/j.tibs.2010.07.008
- 785 Kastelic, N., Landthaler, M., 2017. mRNA interactome capture in mammalian cells. *Methods*  
786 126, 38–43. doi:10.1016/j.ymeth.2017.07.006
- 787 Keene, J.D., 2007. RNA regulons: coordination of post-transcriptional events. *Nature Reviews*  
788 *Genetics* 8, 533–543. doi:10.1038/nrg2111
- 789 Kumari, S., Bugaut, A., Huppert, J.L., Balasubramanian, S., 2007. An RNA G-quadruplex in the  
790 5' UTR of the NRAS proto-oncogene modulates translation. *Nat. Chem. Biol.* 3, 218–221.  
791 doi:10.1038/nchembio864
- 792 Kwok, C.K., Marsico, G., Sahakyan, A.B., Chambers, V.S., Balasubramanian, S., 2016. rG4-seq  
793 reveals widespread formation of G-quadruplex structures in the human transcriptome. *Nat.*  
794 *Meth.* 13, 841–844. doi:10.1038/nmeth.3965
- 795 Lai, J.C., Ponti, S., Pan, D., Kohler, H., Skoda, R.C., Matthias, P., Nagamine, Y., 2012. The  
796 DEAH-box helicase RHAU is an essential gene and critical for mouse hematopoiesis. *Blood*  
797 119, 4291–4300. doi:10.1182/blood-2011-08-362954
- 798 Landthaler, M., Landthaler, M., Gaidatzis, D., Rothballer, A., Chen, P.Y., Soll, S.J., Dinic, L.,  
799 Ojo, T., Hafner, M., Zavolan, M., Zavolan, M., Tuschl, T., Tuschl, T., 2008. Molecular  
800 characterization of human Argonaute-containing ribonucleoprotein complexes and their  
801 bound target mRNAs. *RNA* 14, 2580–2596. doi:10.1261/rna.1351608
- 802 Lattmann, S., Giri, B., Vaughn, J.P., Akman, S.A., Nagamine, Y., 2010. Role of the amino  
803 terminal RHAU-specific motif in the recognition and resolution of guanine quadruplex-RNA  
804 by the DEAH-box RNA helicase RHAU. *Nucleic Acids Research* 38, 6219–6233.  
805 doi:10.1093/nar/gkq372
- 806 Lattmann, S., Stadler, M.B., Vaughn, J.P., Akman, S.A., Nagamine, Y., 2011. The DEAH-box  
807 RNA helicase RHAU binds an intramolecular RNA G-quadruplex in TERC and associates  
808 with telomerase holoenzyme. *Nucleic Acids Research* 39, 9390–9404.  
809 doi:10.1093/nar/gkr630
- 810 Millevoi, S., Moine, H., Vagner, S., 2012. G-quadruplexes in RNA biology. *WIREs RNA* 3, 495–  
811 507. doi:10.1002/wrna.1113
- 812 Morris, M.J., Negishi, Y., Pázsint, C., Schonhoff, J.D., Basu, S., 2010. An RNA G-quadruplex is  
813 essential for cap-independent translation initiation in human VEGF IRES. *J. Am. Chem.*  
814 *Soc.* 132, 17831–17839. doi:10.1021/ja106287x
- 815 Nie, J., Jiang, M., Zhang, X., Tang, H., Jin, H., Huang, X., Yuan, B., Zhang, C., Lai, J.C.,  
816 Nagamine, Y., Pan, D., Wang, W., Yang, Z., 2015. Post-transcriptional Regulation of Nkx2-  
817 5 by RHAU in Heart Development. *CellReports* 13, 723–732.  
818 doi:10.1016/j.celrep.2015.09.043
- 819 Paeschke, K., Bochman, M.L., Garcia, P.D., Cejka, P., Friedman, K.L., Kowalczykowski, S.C.,  
820 Zakian, V.A., 2013. Pif1 family helicases suppress genome instability at G-quadruplex  
821 motifs. *Nature* 497, 458–462. doi:10.1038/nature12149
- 822 Pandey, S., Agarwala, P., Maiti, S., 2013. Effect of loops and G-quartets on the stability of RNA  
823 G-quadruplexes. *J Phys Chem B* 117, 6896–6905. doi:10.1021/jp401739m
- 824 Quinlan, A.R., Hall, I.M., 2010. BEDTools: a flexible suite of utilities for comparing genomic  
825 features. *Bioinformatics* 26, 841–842. doi:10.1093/bioinformatics/btq033
- 826 Rhodes, D., Lipps, H.J., 2015. G-quadruplexes and their regulatory roles in biology. *Nucleic*  
827 *Acids Research* 43, 8627–8637. doi:10.1093/nar/gkv862
- 828 Sauer, M., Paeschke, K., 2017. G-quadruplex unwinding helicases and their function in vivo.  
829 *Biochem. Soc. Trans BST20170097*. doi:10.1042/BST20170097

- 830 Serikawa, T., Eberle, J., Kurreck, J., 2017. Effects of Genomic Disruption of a Guanine  
831 Quadruplex in the 5' UTR of the Bcl-2 mRNA in Melanoma Cells. FEBS Let.  
832 doi:10.1002/1873-3468.12855
- 833 Sexton, A.N., Collins, K., 2011. The 5' guanosine tracts of human telomerase RNA are  
834 recognized by the G-quadruplex binding domain of the RNA helicase DHX36 and function  
835 to increase RNA accumulation. Mol. Cell. Biol. 31, 736–743. doi:10.1128/MCB.01033-10
- 836 Sonenberg, N., Hinnebusch, A.G., 2009. Regulation of Translation Initiation in Eukaryotes:  
837 Mechanisms and Biological Targets. Cell 136, 731–745. doi:10.1016/j.cell.2009.01.042
- 838 Song, J., Perreault, J.-P., Topisirovic, I., Richard, S., 2016. RNA G-quadruplexes and their  
839 potential regulatory roles in translation. Translation (Austin) 4, e1244031.  
840 doi:10.1080/21690731.2016.1244031
- 841 Spitzer, J., Landthaler, M., Landthaler, M., Tuschl, T., 2013. Rapid creation of stable  
842 mammalian cell lines for regulated expression of proteins using the Gateway®  
843 recombination cloning technology and Flp-In T-REx® lines. Meth. Enzymol. 529, 99–124.  
844 doi:10.1016/B978-0-12-418687-3.00008-2
- 845 Steimer, L., Klostermeier, D., 2012. RNA helicases in infection and disease. RNA Biol. 9, 751–  
846 771. doi:10.4161/rna.20090
- 847 Thandapani, P., Song, J., Gandin, V., Cai, Y., Rouleau, S.G., Garant, J.-M., Boisvert, F.-M., Yu,  
848 Z., Perreault, J.-P., Topisirovic, I., Richard, S., 2015. Aven recognition of RNA G-  
849 quadruplexes regulates translation of the mixed lineage leukemia protooncogenes. eLife 4,  
850 e06234. doi:10.7554/eLife.06234
- 851 Todd, A.K., Johnston, M., Neidle, S., 2005. Highly prevalent putative quadruplex sequence  
852 motifs in human DNA. Nucleic Acids Research 33, 2901–2907. doi:10.1093/nar/gki553
- 853 Tran, H., Schilling, M., Wirbelauer, C., Hess, D., Nagamine, Y., 2004. Facilitation of mRNA  
854 deadenylation and decay by the exosome-bound, DEXH protein RHAU. Mol. Cell 13, 101–  
855 111.
- 856 Trapnell, C., Roberts, A., Goff, L., Pertea, G., Kim, D., Kelley, D.R., Pimentel, H., Salzberg, S.L.,  
857 Rinn, J.L., Pachter, L., 2012. Differential gene and transcript expression analysis of RNA-  
858 seq experiments with TopHat and Cufflinks. Nat. Prot. 7, 562–578.  
859 doi:10.1038/nprot.2012.016
- 860 Umate, P., Tuteja, N., Tuteja, R., 2011. Genome-wide comprehensive analysis of human  
861 helicases. cib 4, 118–137. doi:10.4161/cib.4.1.13844
- 862 Vaughn, J.P., Creacy, S.D., Routh, E.D., Joyner-Butt, C., Jenkins, G.S., Pauli, S., Nagamine,  
863 Y., Akman, S.A., 2005. The DEXH protein product of the DHX36 gene is the major source  
864 of tetramolecular quadruplex G4-DNA resolving activity in HeLa cell lysates. J. Biol. Chem.  
865 280, 38117–38120. doi:10.1074/jbc.C500348200
- 866 Wolfe, A.L., Singh, K., Zhong, Y., Drewe, P., Rajasekhar, V.K., Sanghvi, V.R., Mavrakis, K.J.,  
867 Jiang, M., Roderick, J.E., Van der Meulen, J., Schatz, J.H., Rodrigo, C.M., Zhao, C.,  
868 Rondou, P., de Stanchina, E., Teruya-Feldstein, J., Kelliher, M.A., Speleman, F., Porco,  
869 J.A., Pelletier, J., Räscht, G., Wendel, H.-G., 2014. RNA G-quadruplexes cause eIF4A-  
870 dependent oncogene translation in cancer. Nature 513, 65–70. doi:10.1038/nature13485
- 871

872 **FIGURES AND LEGENDS**

Figure 1 / Sauer et al. 2017

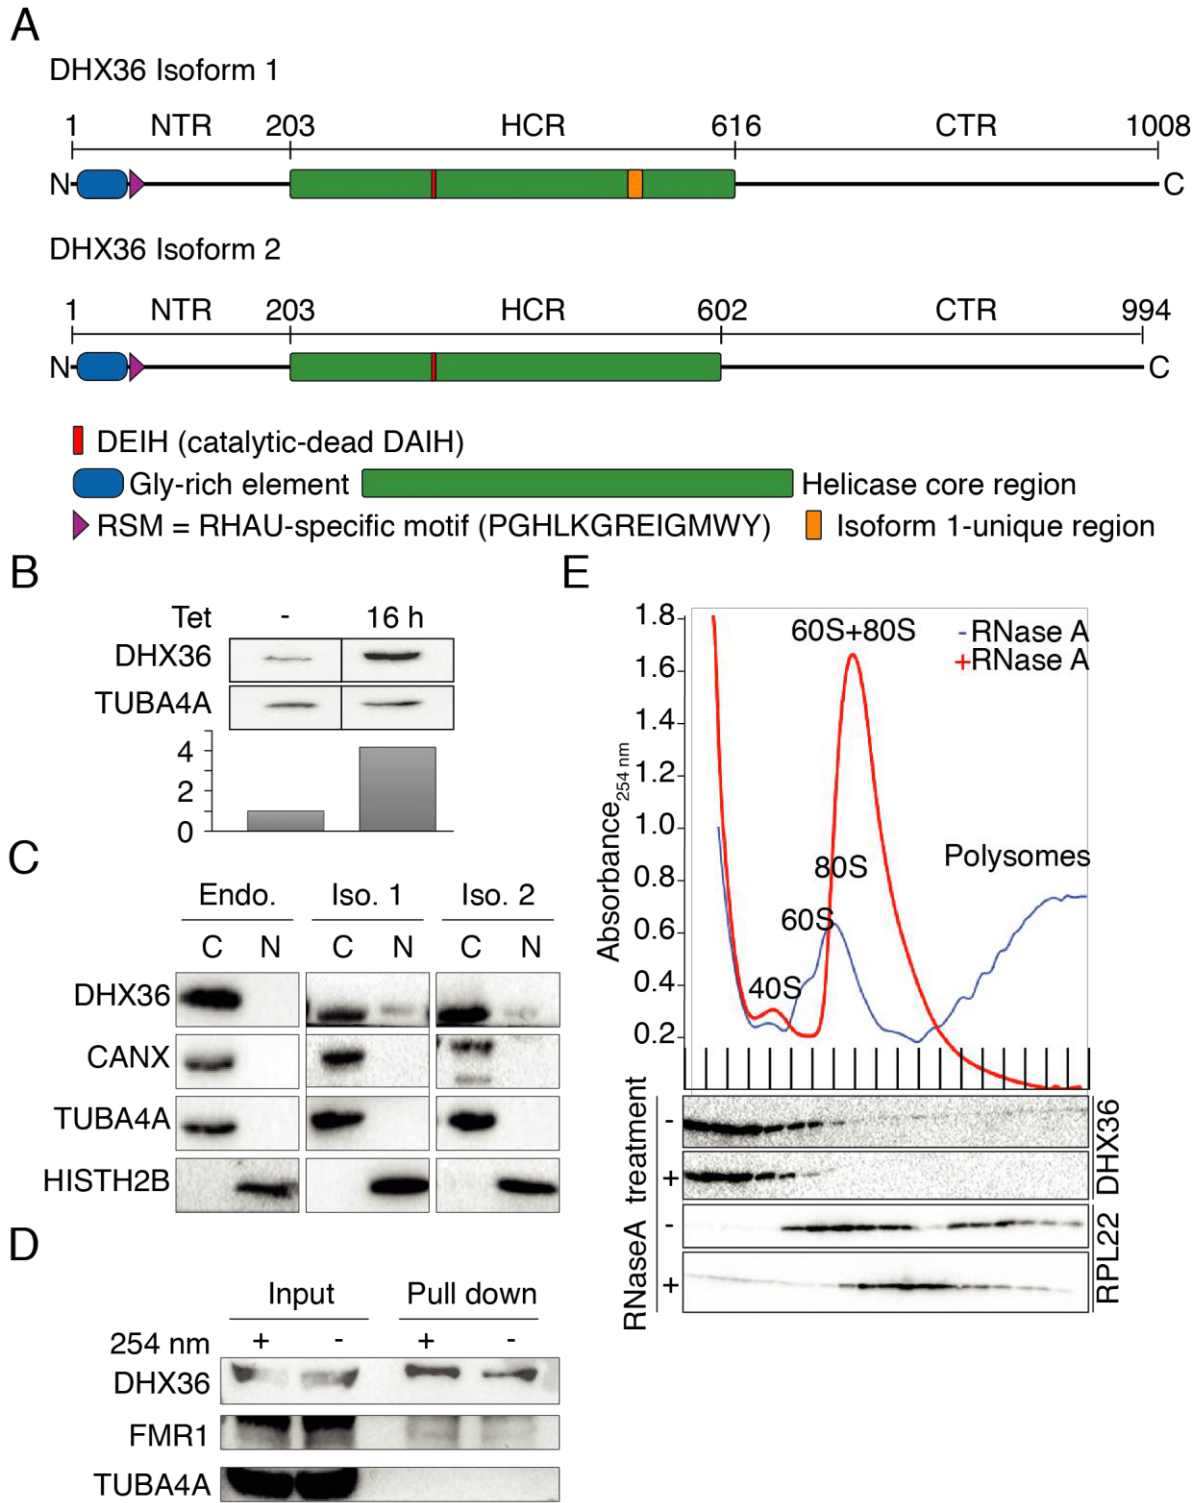

874 **Figure 1: DHX36 is a mainly cytoplasmic DEAH-type helicase and does not interact with**  
875 **the polysome. (A)** Schematic representation of DHX36 isoform1 and 2. The RNA binding Gly-  
876 rich element (blue) and RS motif (purple) are indicated. 14 additional aa in the helicase core  
877 region (green) of isoform 1 are marked in orange. Conserved Walker-B box (red, wildtype  
878 sequence DEIH, mutant sequence DAIH) is indicated in red. **(B)** Quantification of transgenic  
879 FLAG/HA-DHX36 expression upon 16 h induction with tetracycline. Bargraph shows DHX36  
880 levels measured by quantitative Western blotting using an anti-DDX36 antibody and, for  
881 normalization, anti-TUBA4A antibody. **(C)** Endogenous (Endo.), as well as transgenic FLAG/HA-  
882 tagged DHX36 isoform 1 (Iso. 1) and 2 (Iso. 2) are mainly cytoplasmic in biochemical  
883 fractionation experiments from HEK293 cells. Cytosolic (C) and nuclear (N) fractions were  
884 probed with anti-HISTH2B (nuclear marker), anti-TUBA4A (cytoplasmic marker), and anti-CANX  
885 (endoplasmic reticulum marker) antibodies. Endogenous DHX36 and transgenic FH-DHX36  
886 isoforms 1 and 2 were detected with an anti-DHX36 and anti-HA-antibodies, respectively. **(D)**  
887 DHX36 can be co-purified with polyadenylated RNA with and without UV crosslinking. The RBP  
888 FMR1 served as positive, TUBA4A as negative control, respectively. **(E)** UV absorbance at 254  
889 nm of RNaseA-treated and untreated HEK293 cell extracts separated by sucrose gradient  
890 centrifugation are shown. Peaks of UV absorbance corresponding to 40S, 60S, 80S ribosomes,  
891 and polysomes are indicated. Western blots probed for DHX36 and RPL22 are shown below.

Figure 2 / Sauer et al. 2017

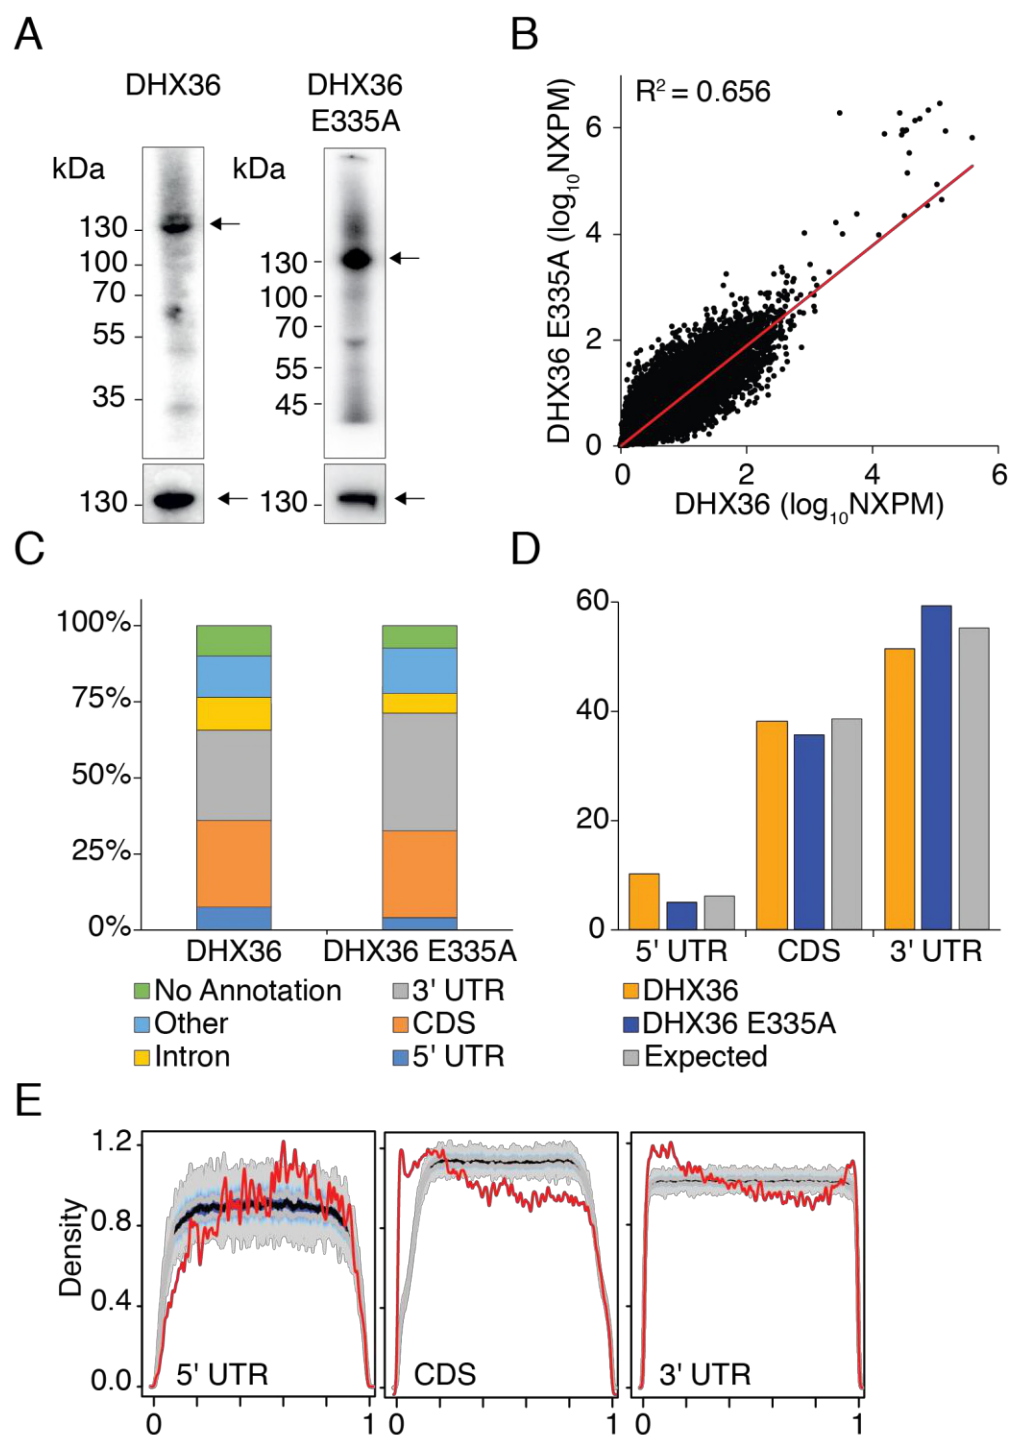

893 **Figure 2: DHX36 interacts with mature mRNAs at thousands of sites.** (A) Autoradiographs  
894 showing *in vivo* crosslinked DHX36- and DHX36 E335A-RNA RNPs from stable HEK293 cells  
895 inducibly expressing FH-DHX36 and FH-DHX36 E335A, respectively. Black arrows indicate  
896 crosslinked DHX36- and DHX36 E335A-RNPs, respectively. Western blot analysis of  
897 immunoprecipitated FH- DHX36 and FH-DHX36 E335A is shown in the lower panel. (B)  
898 Scatterplot of normalized crosslinked reads per million (NXPM) from DHX36 and DHX36 E335A  
899 PAR-CLIP experiments shows high-degree of correlation of high-confidence binding sites.  
900 Correlation coefficient ( $R^2$ ) is indicated. (C) Distribution of PAR-CLIP-derived binding sites  
901 across different annotation categories shows that DHX36 mainly bound mature mRNA in CDS  
902 and UTR. (D) The distribution of DHX36 (orange) and DHX36 E335A (blue) binding sites across  
903 CDS, 3', and 5' UTR matches the distribution expected based on the length of the annotation  
904 categories (grey). (E) DHX36 binds preferentially close to the start and the stop codon based on  
905 a metagene analysis of the distribution of DHX36 binding clusters on mRNAs subdivided into 5'  
906 UTR, CDS, and 3' UTR (red lines). The distribution of 1,000 mismatched randomized controls is  
907 shown in grey lines



Figure 3 / Sauer et al. 2017

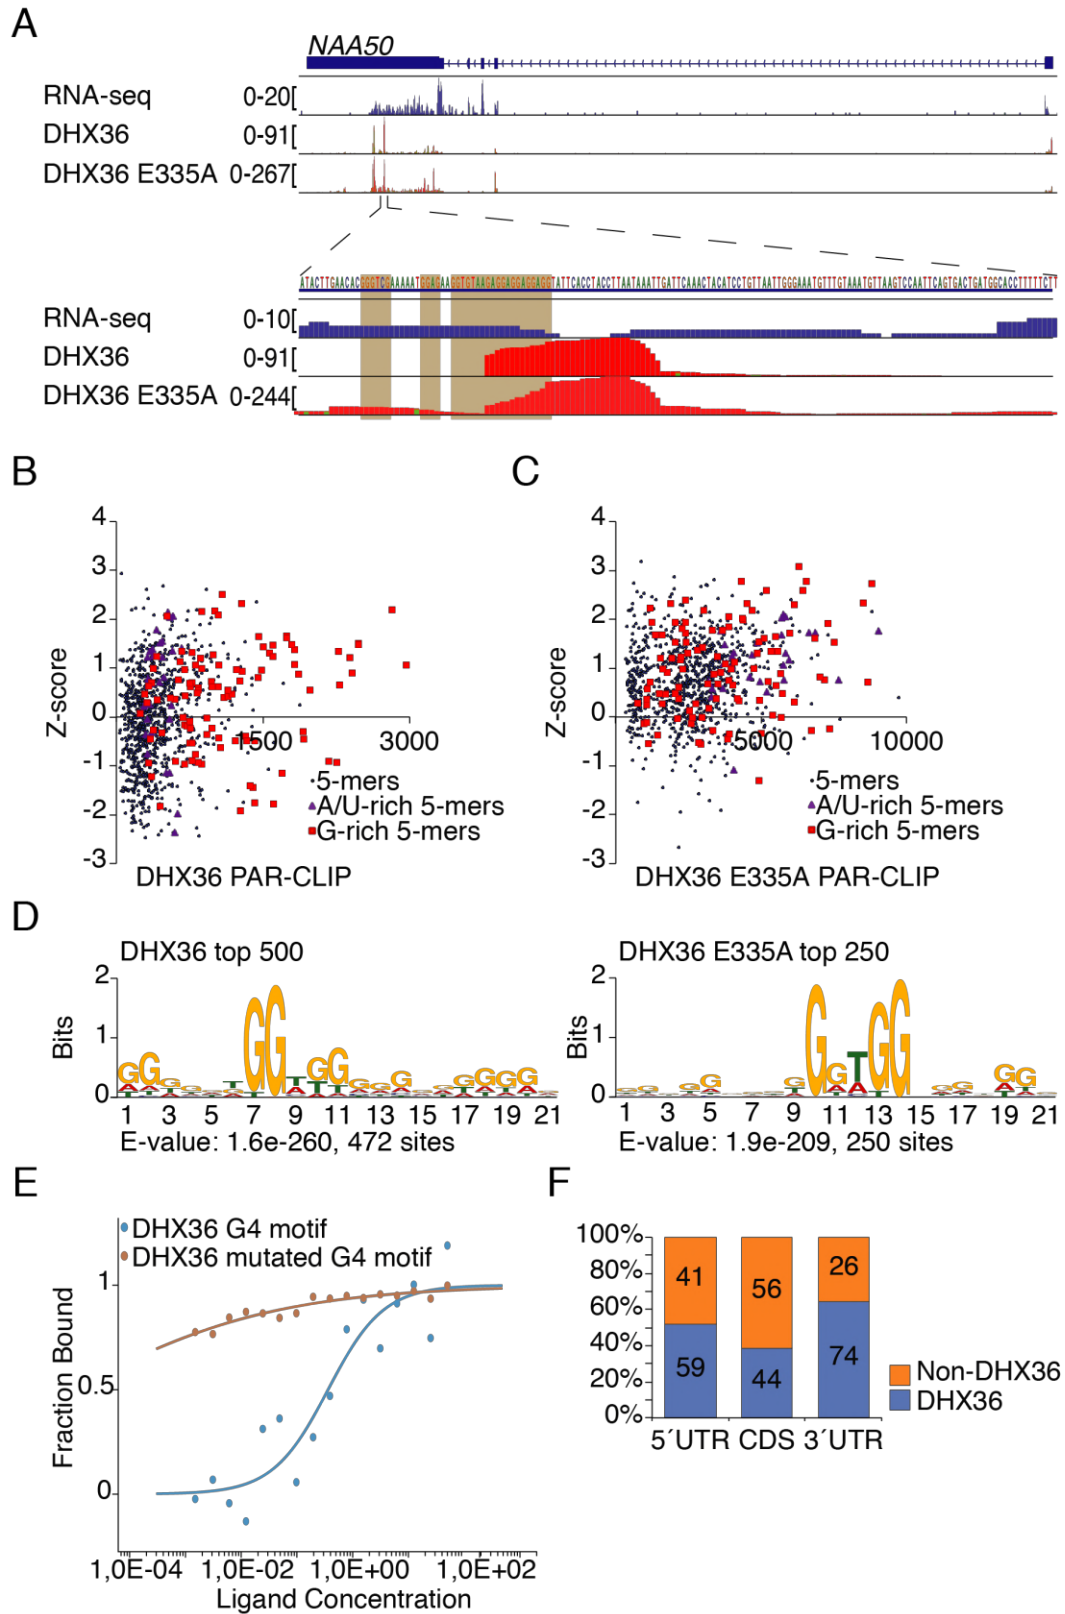

909 **Figure 3: DHX36 recognizes G-rich sequence stretches on mRNA.** (A) Top panel:  
910 Screenshot of the DHX36 and DHX36 E335A PAR-CLIP binding sites for the representative  
911 target gene NAA50. The gene structure is shown, as well as coverage from a HEK293 RNA-seq  
912 experiment. The bottom two tracks show the alignment of sequence reads with characteristic T-  
913 to-C mutations from a DHX36 and DHX36 E335A PAR-CLIP experiment. Bottom panel: Close-  
914 up of the indicated 150 nt region in the 3' UTR of NAA50. The G-rich DHX36 binding element is  
915 highlighted in orange. (B) A comparison of Z-scores and occurrence of all possible 5-mers  
916 shows an enrichment of G-rich sequences in DHX36 PAR-CLIP binding sites. 5-mers containing  
917 at least three Gs (red squares) or consist of A and U- (purple triangles) are highlighted. (C)  
918 Same plot as in (B) for DHX36 E335A PAR-CLIP shows additional enrichment for A/U-rich 5-  
919 mers. (D) Weblogo of RNA recognition element of DHX36 (left) and DHX36 E335A (right) PAR-  
920 CLIP binding sites generated by MEME (p-value less than 0.0001). (E) Microscale  
921 thermophoresis analysis shows binding of DHX36 to the DHX36-binding motif (Cy5-  
922 AAAAAGGAGGAGGAGGAGG) but not to the mutated motif (Cy5-  
923 AAAAAGCAGCAGGAGCAGCA). (F) Percent of sites in the human transcriptome forming G4  
924 structures *in vitro* categorized by 5' UTR, CDS, and 3' UTR (Kwok et al., 2016) found in DHX36  
925 PAR-CLIP binding sites (blue).



Figure 4 / Sauer et al. 2017

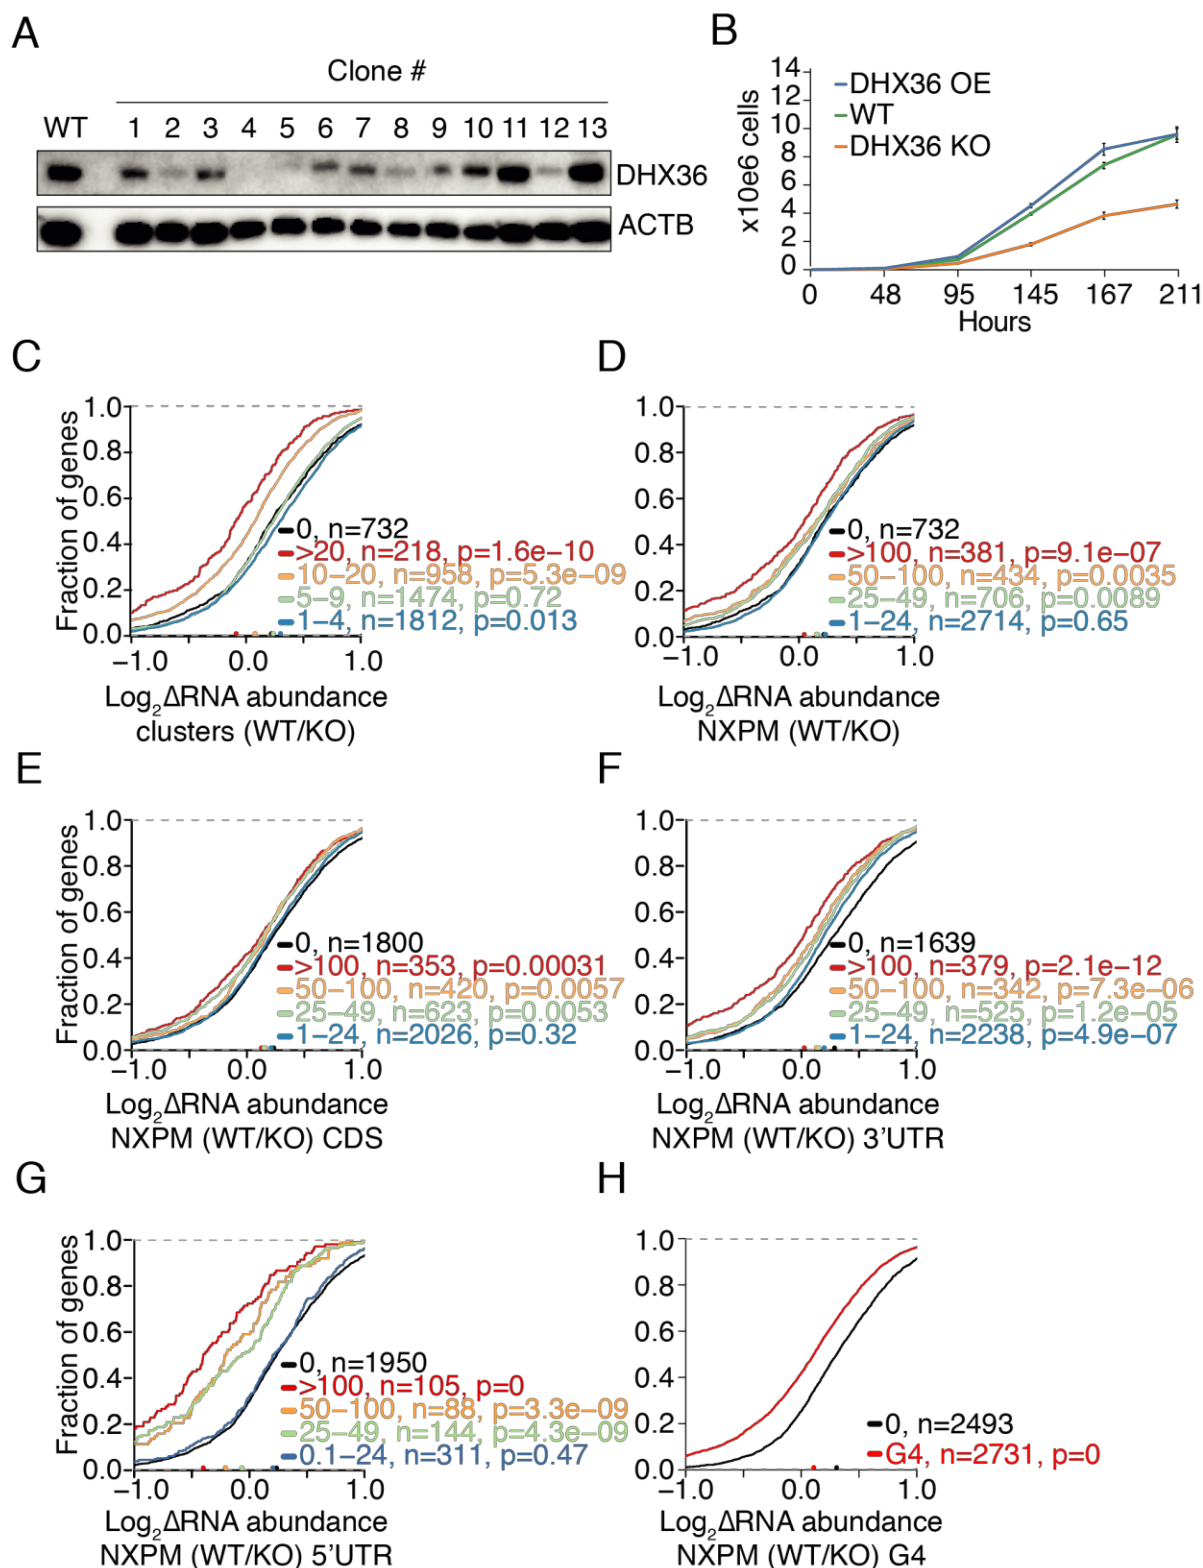

927 **Figure 4: DHX36 KO results in increased target RNA abundance.** (A) Western blot  
928 screening after Cas9-mediated gene editing shows that DHX36 was knocked out in clones 4  
929 and 5. ACTB serves as loading control. (B) DHX36 KO (KO) severely reduces cell proliferation  
930 compared to wild type (WT).  $1 \times 10^5$  cells were seeded at  $t=0$  and the cell number was counted  
931 ( $\times 10^6$ ) at indicated timepoints. Error bars represent standard deviations of three independent  
932 experiment. (C) DHX36 KO results in an increased target mRNA abundance shown by  
933 cumulative distribution functions comparing changes in target mRNA abundance of DHX36  
934 knockout cells ( $n=3$ ) and parental HEK293 cells ( $n=3$ ). Target mRNAs were binned in  
935 accordance to the number of binding clusters obtained by DHX36 E335A PAR-CLIP.  
936 Significance was determined using a two-sided Kolmogorov-Smirnov (KS) test. (D) Same as in  
937 (C), except target mRNAs were binned in accordance to NXPM. (E) Same as in (C), except  
938 mRNAs were binned based on the number of NXPM in the CDS. (F) Same as in (C), except  
939 mRNAs were binned based on the number of NXPM in the 3' UTR. (G) Same as in (C), except  
940 mRNAs were binned based on the number of NXPM in the 5'UTR. (H) Same as in (C), except  
941 mRNAs were binned based on whether they harbor a G4-site identified previously (Kwok et al.,  
942 2016) overlapping with PAR-CLIP binding sites or not.

Figure 5 / Sauer et al. 2017

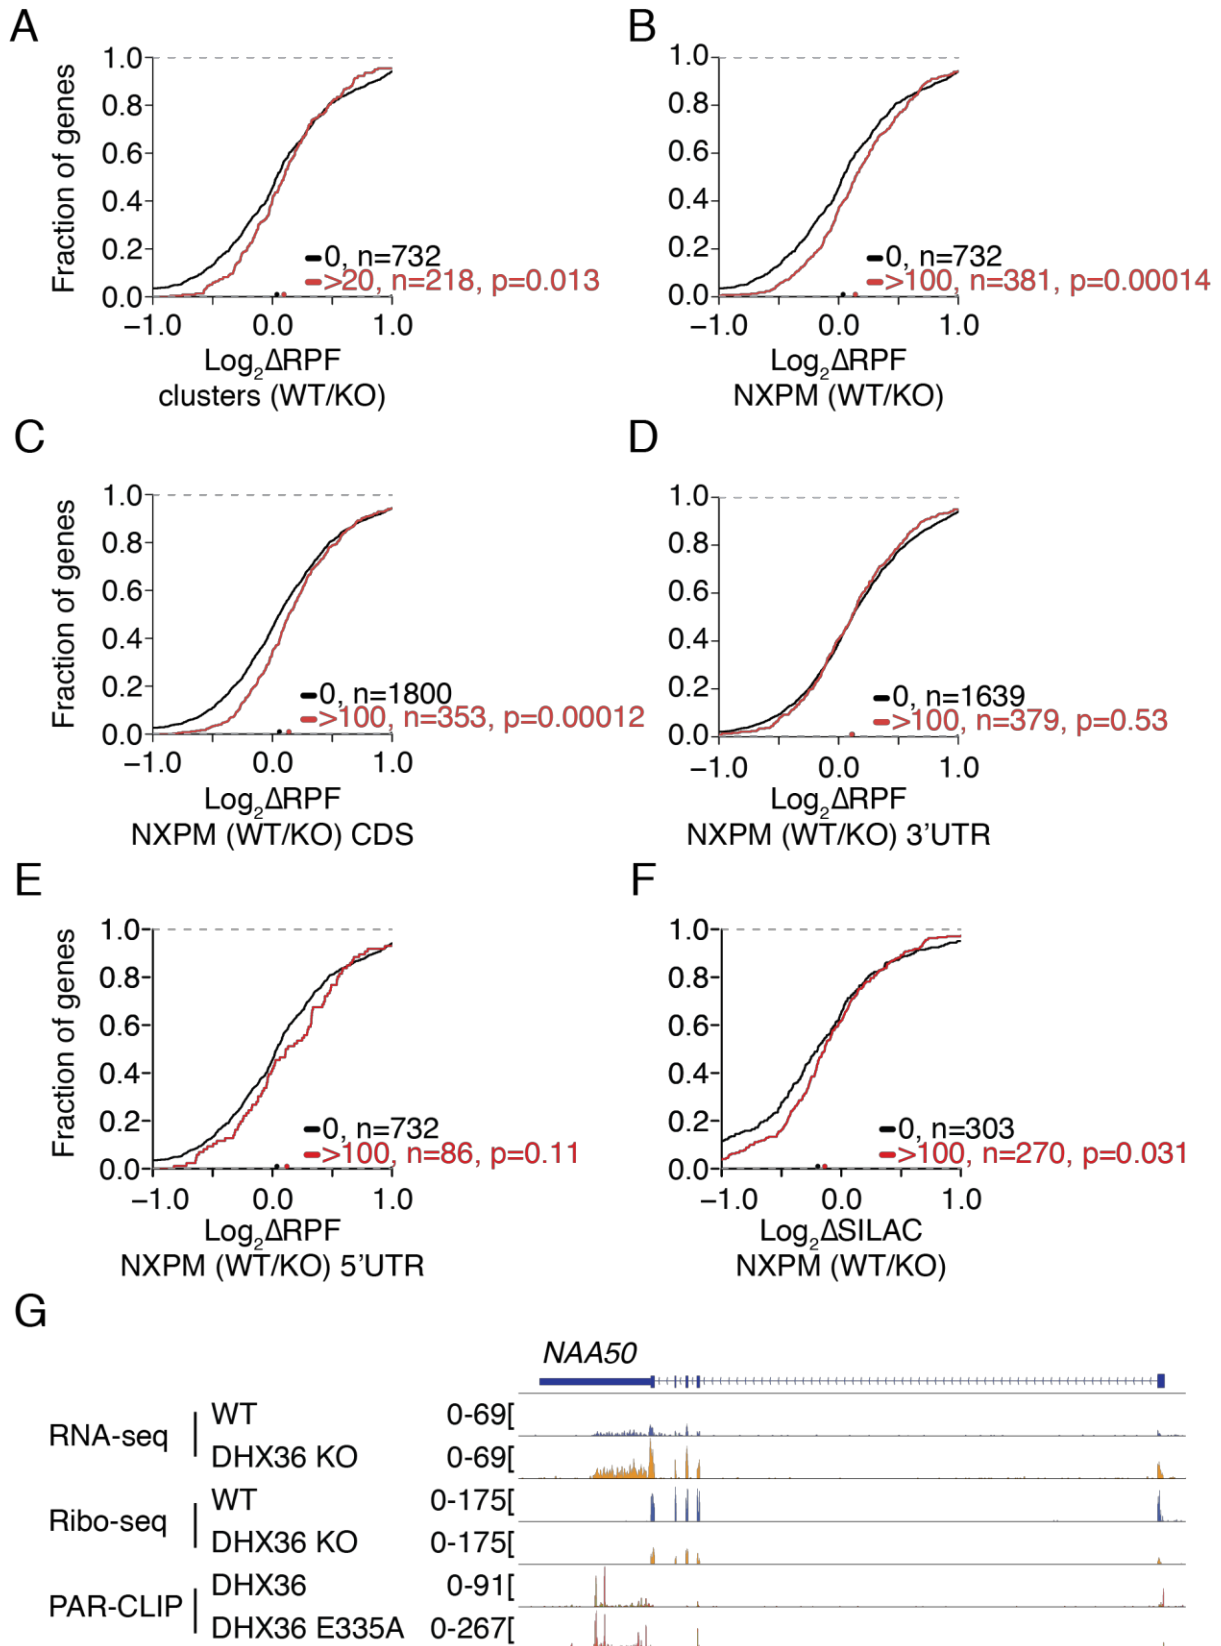

944 **Figure 5: DHX36 KO results in slightly reduced target mRNA translation.** (A) Cumulative  
945 distribution function comparing changes in ribosome-protected fragments (RPFs) of DHX36 KO  
946 (n=3) and parental HEK293 cells (n=3). Target mRNAs are binned in accordance to the number  
947 of binding clusters obtained by DHX36 E335A PAR-CLIP. Significance was determined using a  
948 two-sided KS-test. (B) Same as in (A), except target mRNAs were binned in accordance to  
949 NXPM. (C) Same as in (A), except mRNAs were binned based on the number of NXPM in the  
950 CDS. (D) Same as in (A), except mRNAs were binned based on the number of NXPM in the 3'  
951 UTR. (E) Same as in (A), except mRNAs were binned based on the number of NXPM in the 5'  
952 UTR. (F) Same as in (A), except protein abundance changes as determined by SILAC were  
953 plotted. (G) Screenshot of RNA-seq and Ribo-seq coverage in wildtype and DHX36 KO HEK293  
954 cells on the representative DHX36 target NAA50. Bottom two tracks show the coverage for  
955 DHX36 and DHX36 E335A PAR-CLIP.  
956

Figure 6 / Sauer et al. 2017

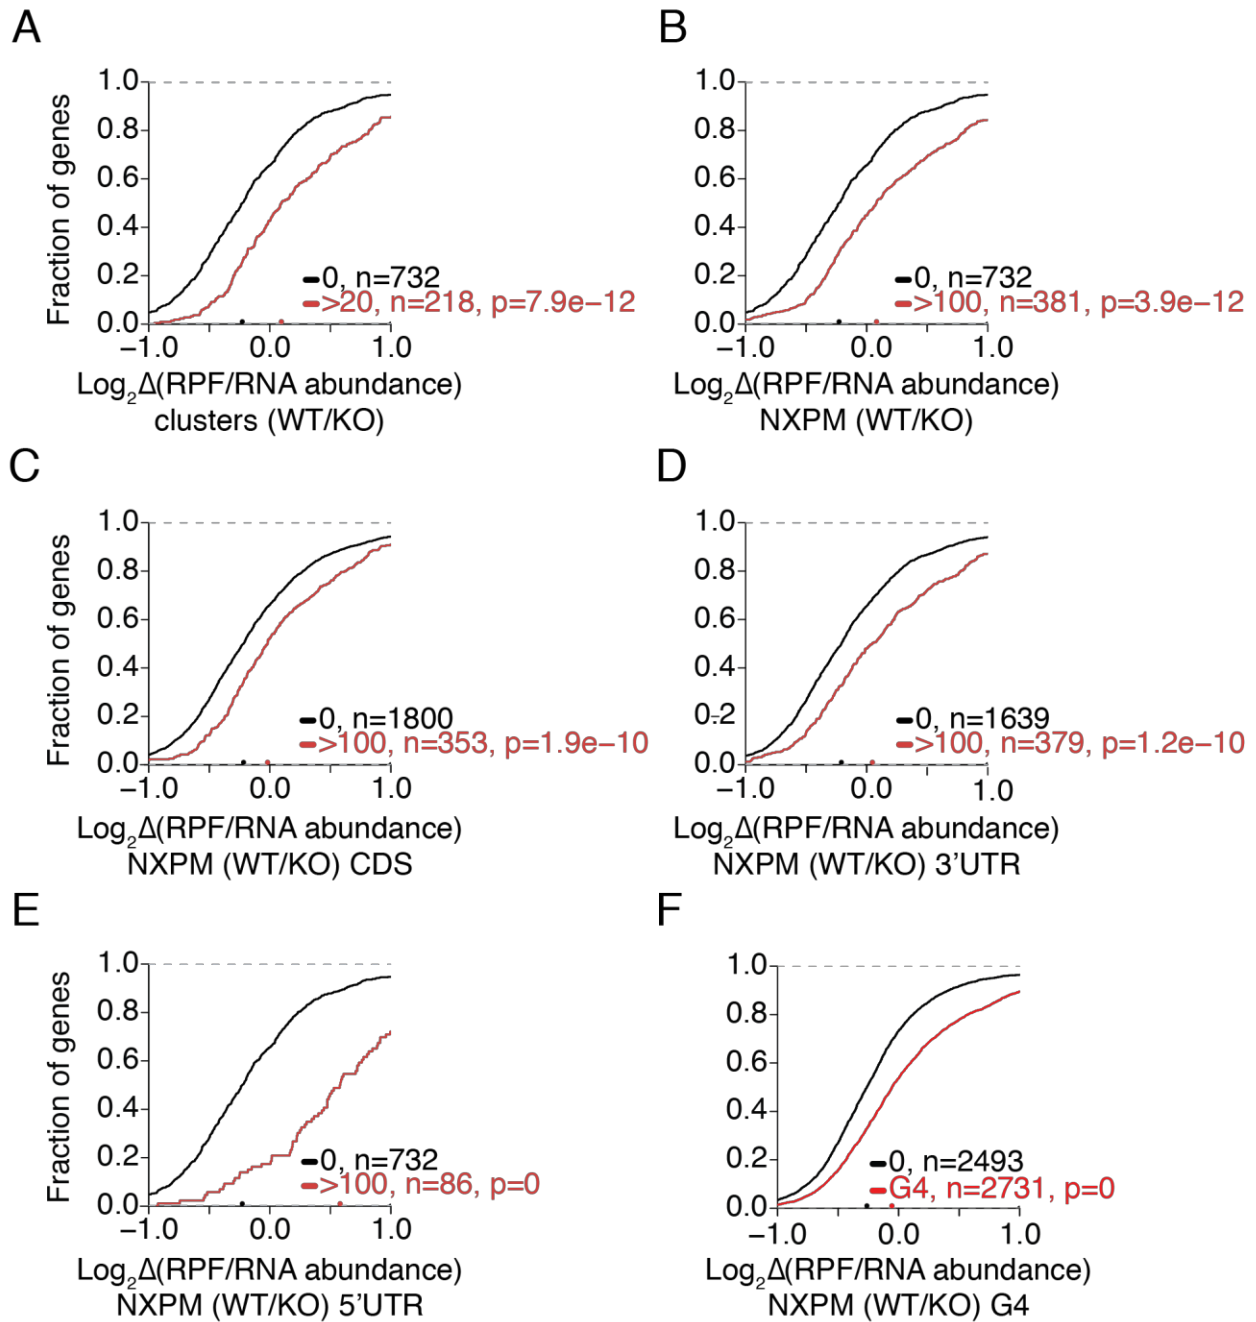

958 **Figure 6: DHX36 increases target mRNA translational efficiency.** (A) Cumulative distribution  
959 function comparing changes in translation efficiency (TE, RPF/RNA abundance) of DHX36 KO  
960 (n=3) and parental HEK293 cells (n=3). Target mRNAs are binned in accordance to the number  
961 of binding clusters obtained by DHX36 E335A PAR-CLIP. Significance was determined using a  
962 two-sided KS test. (B) Same as in (A), except target mRNAs were binned in accordance to  
963 normalized crosslinked reads per million. (C) Same as in (A), except mRNAs were binned  
964 based on the number of NXPM in the CDS. (D) Same as in (A), except mRNAs were binned  
965 based on the number of NXPM in the 3' UTR. (E) Same as in (A), except mRNAs were binned  
966 based on the number of NXPM in the 5' UTR. (F) Same as in (A), except mRNAs were binned  
967 based on whether they harbor a G4-site identified previously (Kwok et al., 2016) overlapping  
968 with PAR-CLIP binding sites or not.  
969

## Figure 7 / Sauer et al. 2017

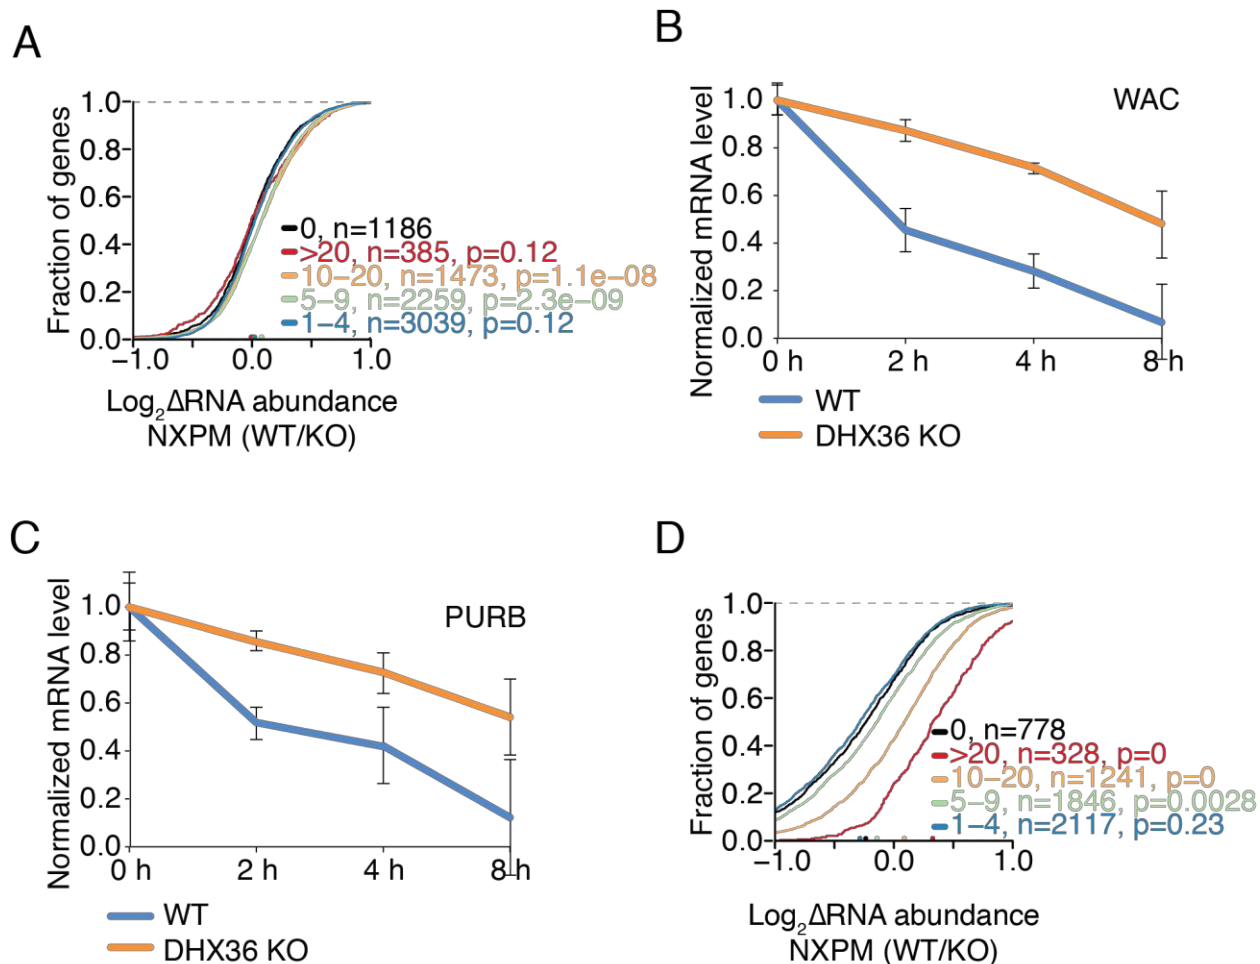

970

971 **Figure 7: DHX36 regulates target mRNA stability by resolving G-rich structures in their**

972 **UTRs. (A)** DHX36 KO regulates target mRNA abundance at a posttranscriptional rather than

973 transcriptional level shown by cumulative distribution functions comparing changes in nascent

974 target mRNA abundance purified from chromatin of DHX36 knockout cells (n=3) and parental

975 HEK293 cells (n=3). Target mRNAs were binned in accordance to the number of binding  
976 clusters obtained by DHX36 E335A PAR-CLIP. Significance was determined using a two-sided  
977 KS test. **(B,C)** DHX36 target mRNAs increase their half-life upon DHX36 KO shown by qPCR of  
978 WAC (B) and PURB (C) after transcriptional block using Actinomycin D and isolation of RNA at  
979 the indicated timepoints. **(D)** Stabilization of G4 structures using pyridostatin (PDS) in HEK293  
980 cells results in the accumulation of DHX36 PAR-CLIP targets to a larger degree than DHX36  
981 KO shown by cumulative distribution functions comparing changes in target mRNA abundance  
982 of DHX36 knockout cells (n=3) and parental HEK293 cells treated with PDS (n=3). Target  
983 mRNAs were binned in accordance to the number of binding clusters obtained by DHX36  
984 E335A PAR-CLIP. Significance was determined using a two-sided KS test.



985 **SUPPLEMENTARY FIGURES AND LEGENDS**

986

## Suppl. Figure 1 / Sauer et al. 2017

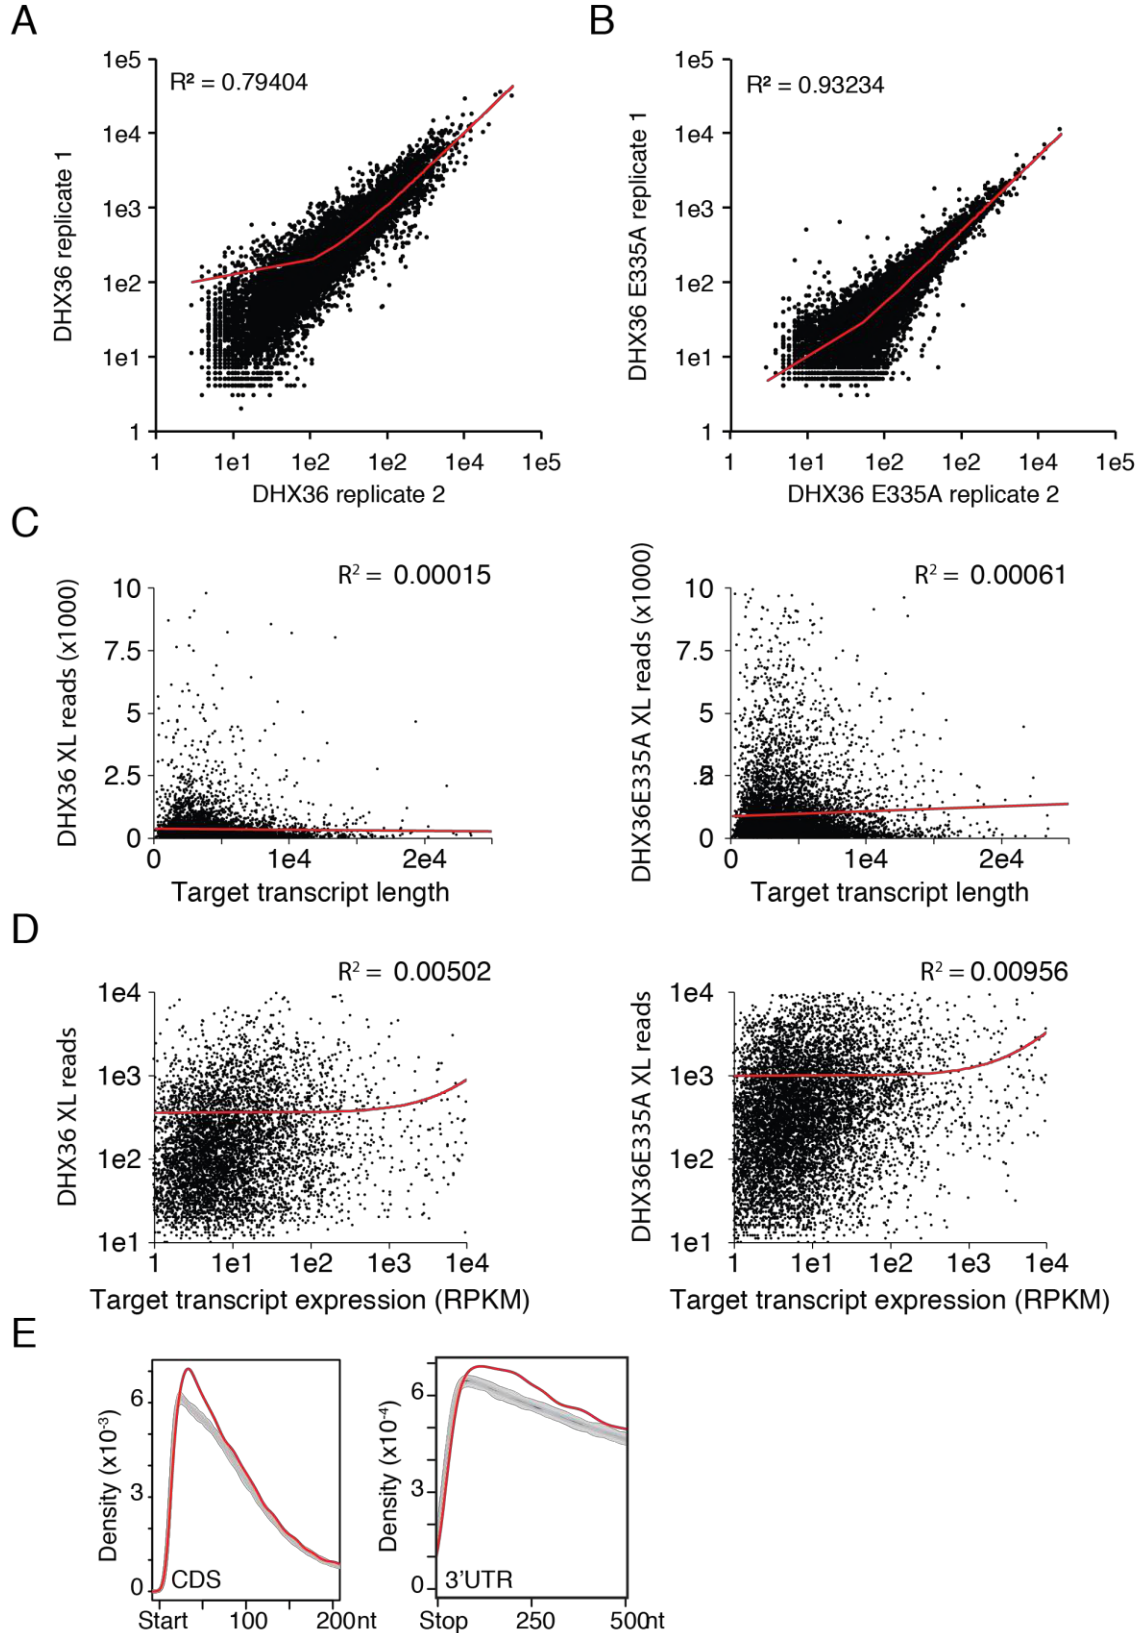

988 **Supplementary Figure 1: Replicates of DHX36 and DHX36 E335A PAR-CLIP and binding**  
989 **determinants (related to Figure 2).** The correlation of crosslinked reads from the biological  
990 replicates of DHX36 **(A)** or DHX36 E335A **(B)** PAR-CLIP experiments is shown. **(C)** DHX36  
991 binding on target mRNA is determined neither by target transcript length nor expression.  
992 Correlation between crosslinked reads from DHX36 PAR-CLIP (left panels) or DHX36 E335A  
993 (right panel) PAR-CLIP and target transcript length. **(D)** Correlation of DHX36 binding with target  
994 transcript expression from DHX36 PAR-CLIP (left panels) or DHX36 E335A (right panel).  
995 Correlation coefficient ( $R^2$ ) are indicated. **(E)** Details of Figure 2E. Metagene analyses of the  
996 distribution of DHX36 binding clusters 200 nt downstream of the start codon and 500 nt  
997 downstream of the stop codon, respectively. The distribution of 1,000 mismatched randomized  
998 controls is shown in grey lines

## Suppl. Figure 2 / Sauer et al. 2017

A

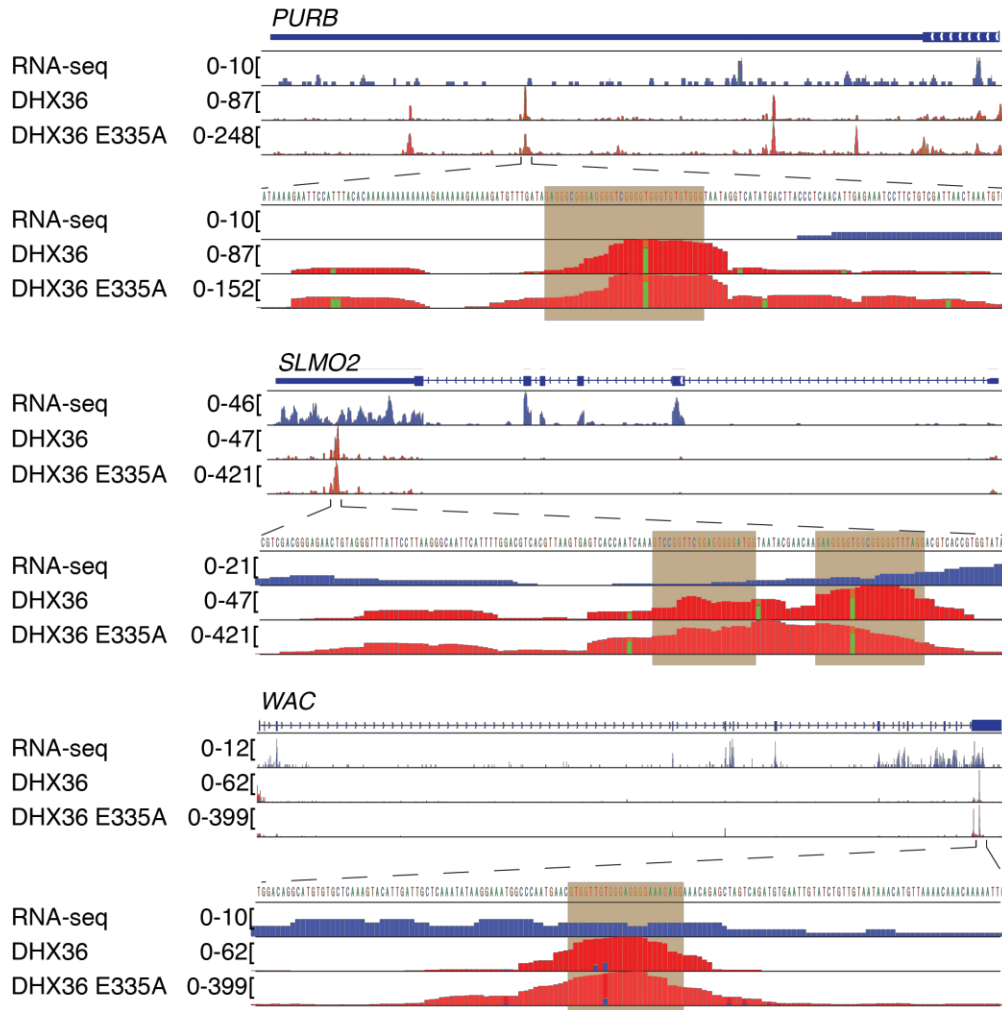

B

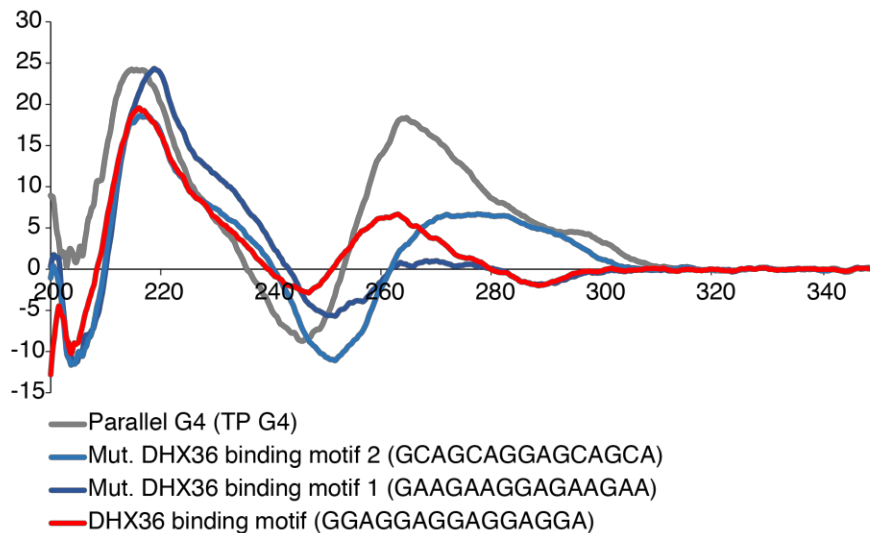

1000 **Supplementary Figure 2: DHX36 binds at G-rich sites and the consensus motif is able to**  
1001 **form a parallel G-quadruplex *in vitro* (related to Figure 3).** (A) Top panels: Screenshots of  
1002 the DHX36 and DHX36 E335A PAR-CLIP binding sites for the representative target genes  
1003 PURB, SLMO2, and WAC. The gene structure is shown, as well as coverage from a HEK293  
1004 RNA-seq experiment. The bottom two tracks show the alignment of sequence reads with  
1005 characteristic T-to-C mutations from a DHX36 and DHX36 E335A PAR-CLIP experiment.  
1006 Bottom panels: Close-up of the indicated 150 nt region in the 3' UTR of PURB, SLMO2, and  
1007 WAC. The G-rich DHX36 binding element is highlighted in orange. (B) Circular dichroism  
1008 measurements of oligonucleotides indicated below after performing the G4-folding protocol.  
1009 The DHX36 PAR-CLIP derived binding motif (red) shifts towards peaks of positive control TP-  
1010 G4 (grey), whereas a mutated binding motif (light and dark blue) do not shift. Lines represent  
1011 mean of ten subsequent measurements.  
1012

## Suppl. Figure 3 / Sauer et al. 2017

**A**

```
29814463.seq GGCACCTGAAAGGCCGCGAAATCGGCATGTG-----
HEK293_gDNA  GGCACCTGAAAGGCCGCGAAATCGGCATGTGGTACGCGAAAAAACAGGGGCAGAA
guide       -----TGTGGTACGCGAAAAAACAG-----

29814463.seq -----GCAAGAGGTAATCTCGGATTCAGTAGTGGAGAGGATGAGG
HEK293_gDNA  CAAGGAAGCGGAGAGGCAAGAGGTAATCTCGGATTCAGTAGTGGAGAGGATGAGG
```

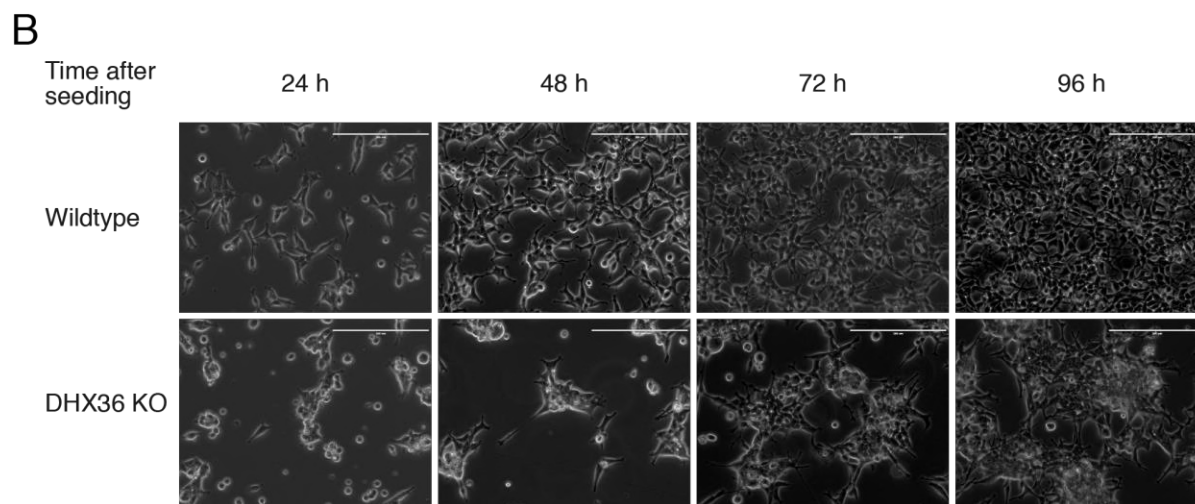

1013  
1014 **Supplementary Figure 3: DHX36 KO cell lines (related to Figure 4).** (A) Sequence of  
1015 genomic DNA of DHX36 knockout clone indicates the disruption of the gene. Sequence of guide  
1016 RNA (gRNA) is indicated. (B) DHX36 KO cells have a proliferation defect. Changes in  
1017 morphology of DHX36 knockout cells compared to parental wildtype HEK293 cells. KO cells are  
1018 not able to equally spread over the culture plate surface. Images were taken at indicate  
1019 timepoints after seeding. Bar represents nm.

Suppl. Figure 4 / Sauer et al. 2017

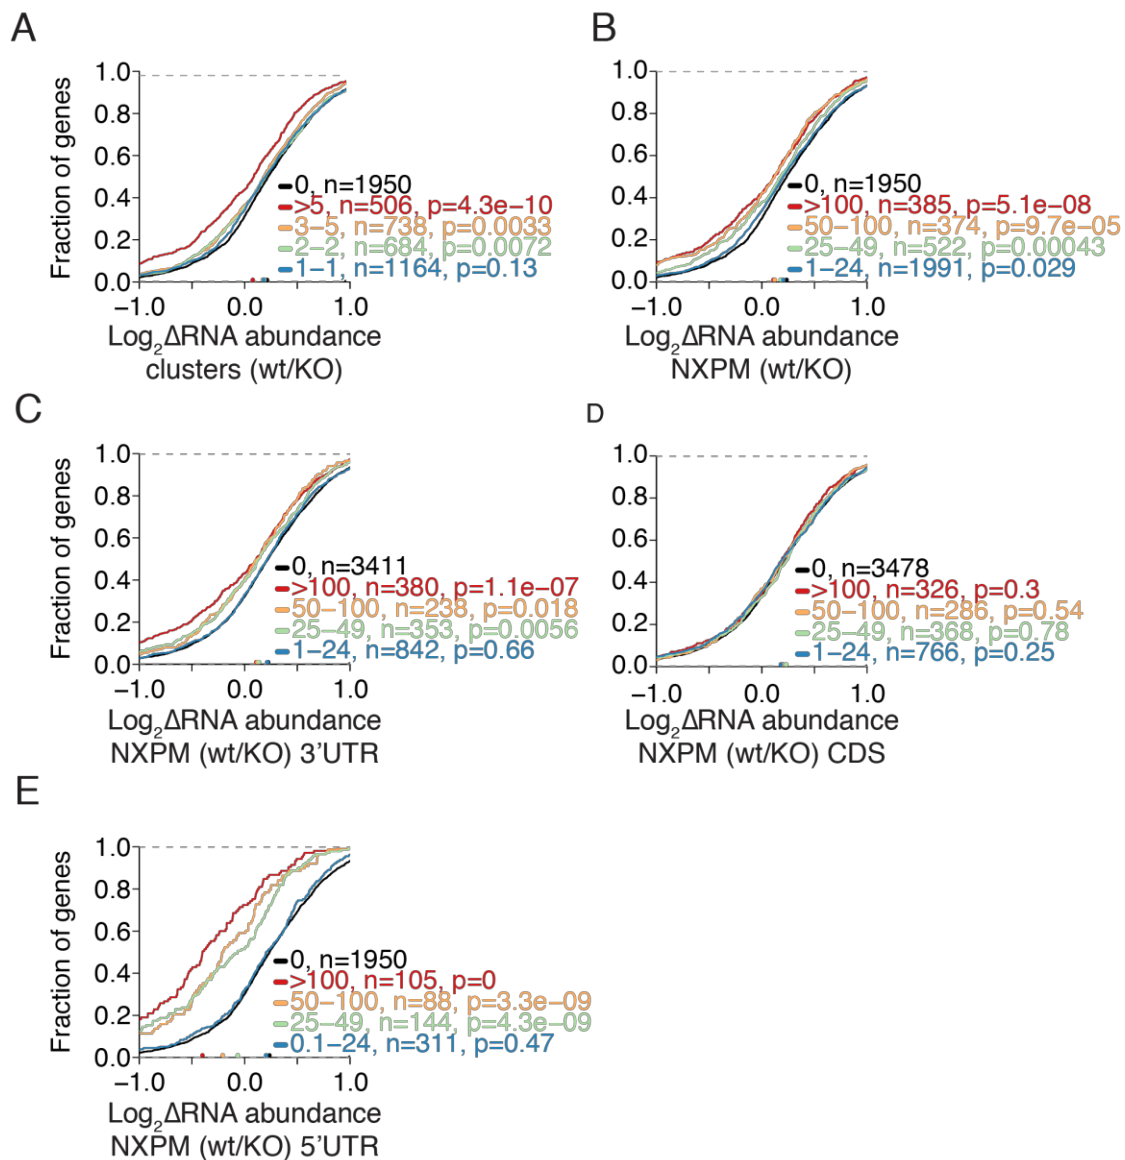

1021 **Supplementary Figure 4: same as Figure 4, but showing data for the wildtype FH-DHX36**

1022 **(related to Figure 4)**



Suppl. Figure 5 / Sauer et al. 2017

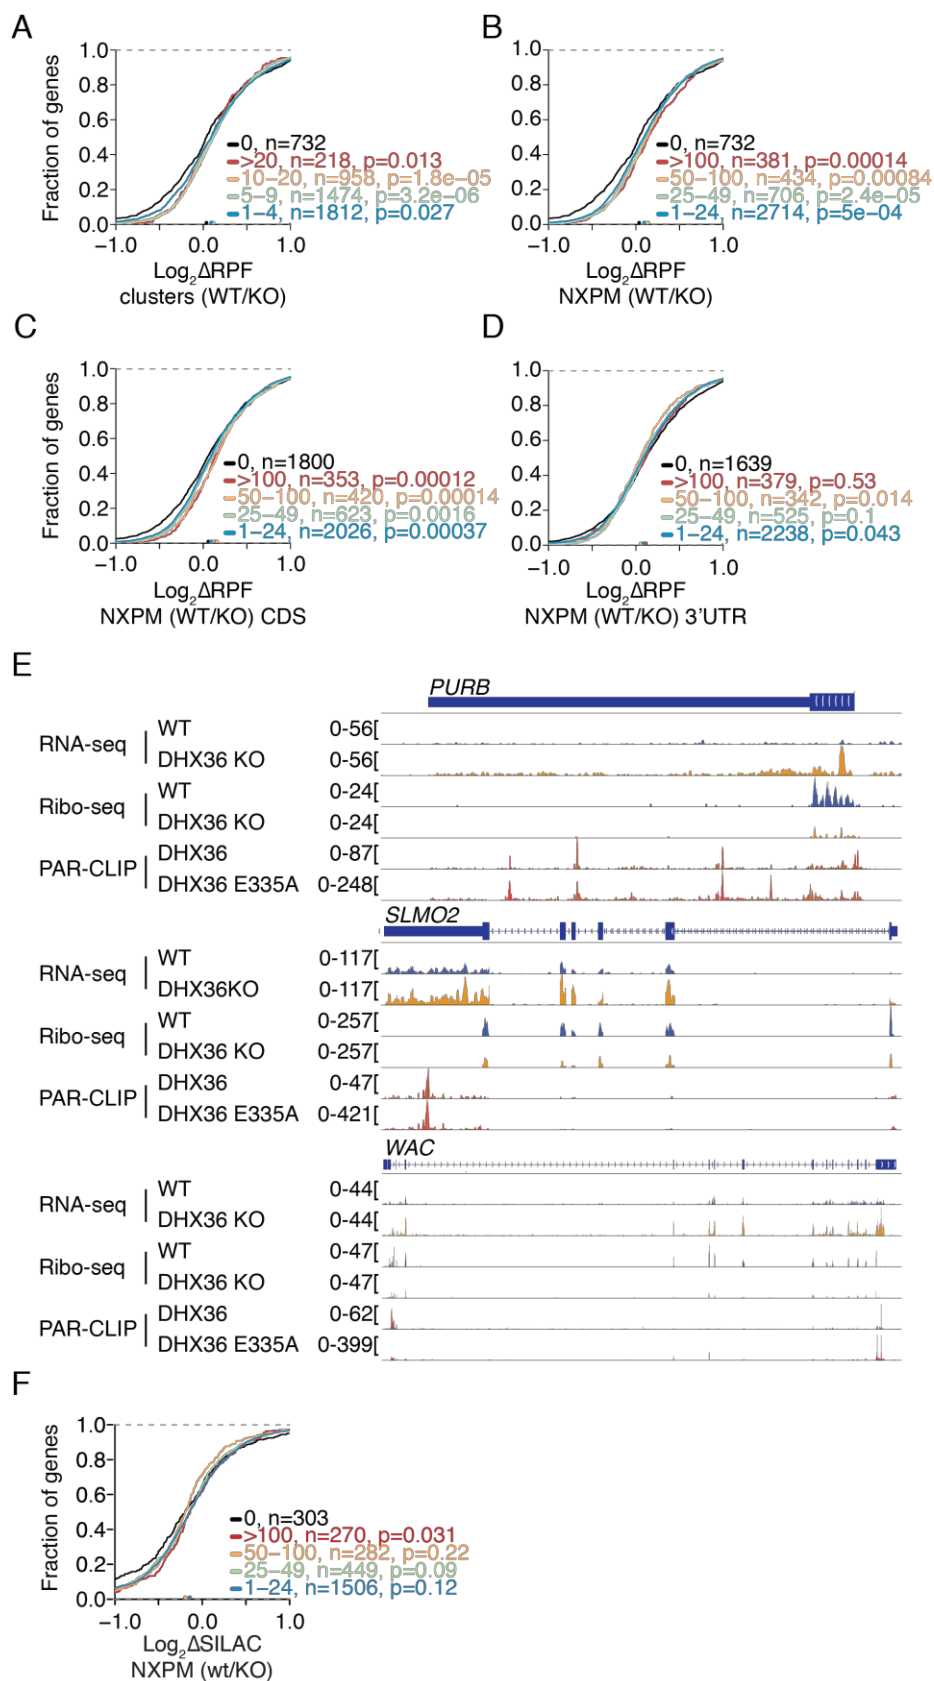

1024 **Supplementary Figure 5 (related to Figure 5): (A-D, F)** Same CDFs as in Fig. 5, only with  
1025 bins representing all DHX36 PAR-CLIP targets, not just top targets. **(E)** Screenshot of RNA-seq  
1026 and Ribo-seq coverage in wildtype and DHX36 KO HEK293 cells on the representative DHX36  
1027 targets PURB, SLMO2, and WAC. Bottom two tracks show the coverage for DHX36 and DHX36  
1028 E335A PAR-CLIP.

## Suppl. Figure 6 / Sauer et al. 2017

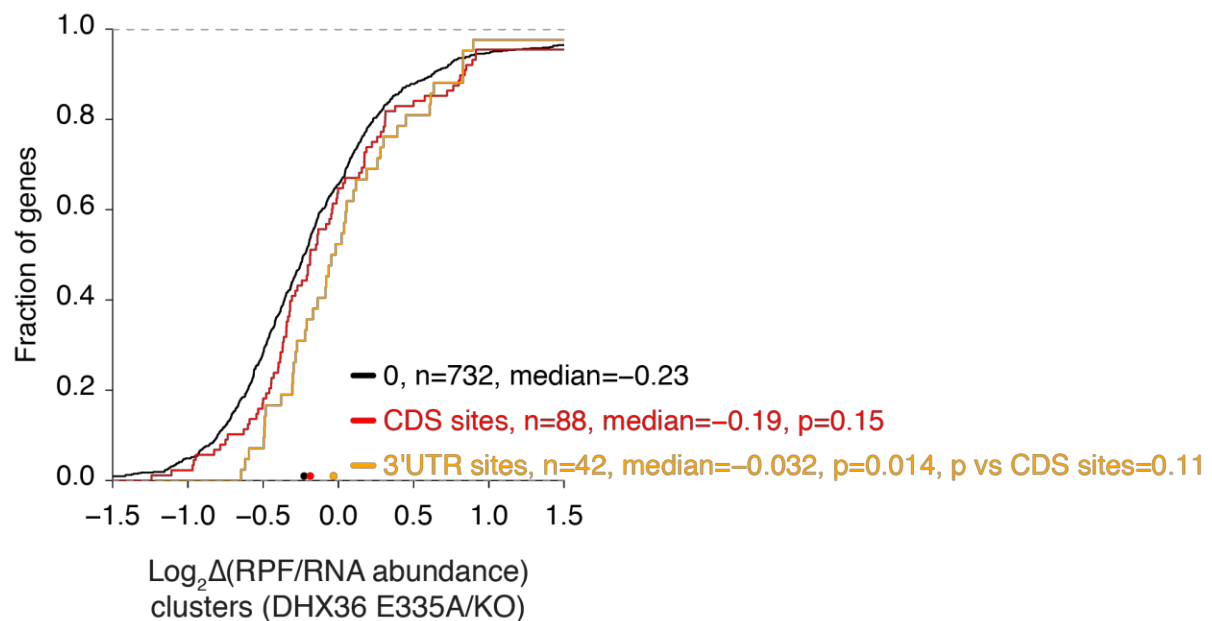

**Supplementary Figure 6: CDS binding by DHX36 does not alter target mRNA abundance (related to Figure 6).** Cumulative distribution function comparing changes in DHX36 target mRNA abundance of DHX36 knockout cells (n=3) and parental HEK293 cells (n=3). DHX36-target mRNAs (determined by binding clusters) are separated by coding-sequence bound and 3'UTR bound.

## Suppl. Figure 7 / Sauer et al. 2017

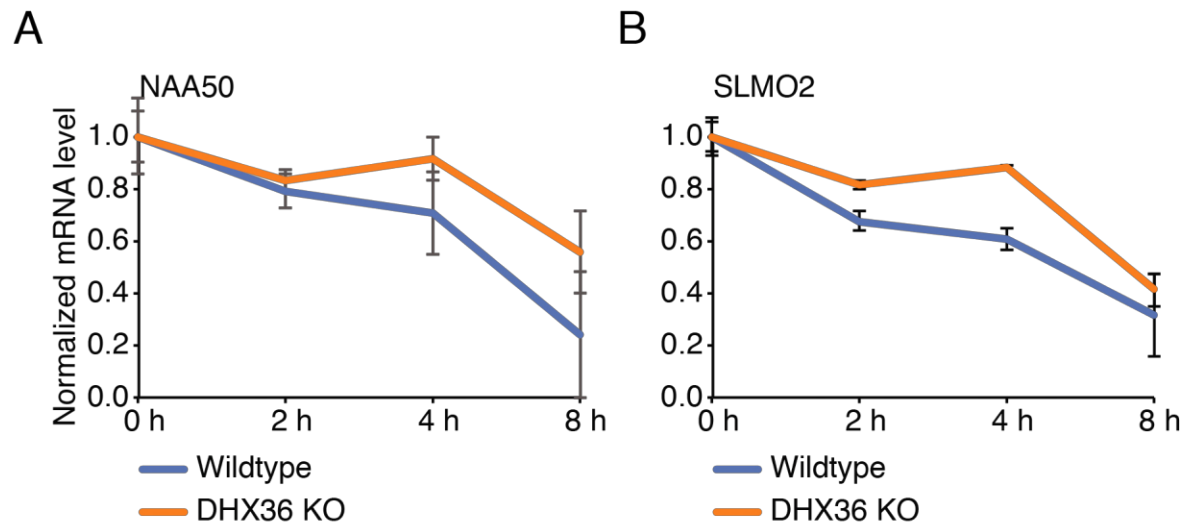

1035  
1036 **Supplementary Figure 7: DHX36 regulates target mRNA stability (related to Figure 7)**

1037 DHX36 target mRNAs increase their half-life upon DHX36 KO shown by qPCR of NAA50 (A)  
1038 and SLMO2 (B) after transcriptional block using Actinomycin D and isolation of RNA at the  
1039 indicated timepoints.

1040 **SUPPLEMENTARY TABLES**

1041 **Supplementary Table S1. Overlap of known DHX36 RNA targets with PAR-CLIP clusters**  
1042 **and sequencing statistics of PAR-CLIPs. Related to Figure 2.**

1043

1044 **Supplementary Table S2. Occurrence and Z-scores for all 5-mers in the high confidence**  
1045 **PAR-CLIP binding sites for DHX36 and DHX36 E335A. Related to Figure 3.**

1046

1047 **Supplementary Table S3. RNA-seq for DHX36 KO and parental HEK293 cells. Related to**  
1048 **Figure 4.**

1049

1050 **Supplementary Table S4. Ribo-seq data for DHX36 KO and parental HEK293 cells.**  
1051 **Related to Figure 5.**

1052

1053 **Supplementary Table S5. RNA-seq data from chromatin for DHX36 KO and parental**  
1054 **HEK293 cells, as well as RNA-seq of total RNA from DHX36 KO and parental HEK293**  
1055 **cells treated with PDS. Related to Figure 7.**
